# Supplementary material
Source: publisher figshare collection journal article supplement (https://tandf.figshare.com/ndownloader/files/17616836)
Supplement: Supplementary file 1 [file 17616836]

**Novel two chain fatty acid based-lipids for development of vancomycin pH-responsive liposomes against *Staphylococcus aureus* and Methicillin-resistant *Staphylococcus aureus* (MRSA)**

Sifiso S. Makhathini1, Rahul S. Kalhapure1,3*, Mahantesh Jadhav, Ayman Y. Waddad1, Ramesh Gannimani1, Calvin A. Omolo1, Sanjeev Rambharose1,2, Chunderika Mocktar1, Thirumala Govender1,*.

1Discipline of Pharmaceutical Sciences, College of Health Sciences, University of KwaZulu-Natal, Private Bag X54001, Durban, South Africa

2Division of Emergency Medicine, Department of Surgery, University of Cape Town, Cape Town, South Africa

3School of Pharmacy, The University of Texas at El Paso, 500 W University Ave, El Paso, TX 79968, USA.

*Corresponding author.

Email address: [govenderth@ukzn.ac.za](mailto:govenderth@ukzn.ac.za); [rahul.kalhapure@rediffmail.com](mailto:rahul.kalhapure@rediffmail.com), [rkalhapure@utep.edu](mailto:rkalhapure@utep.edu)

**Supporting information**

1H NMR characterization of compound **3**


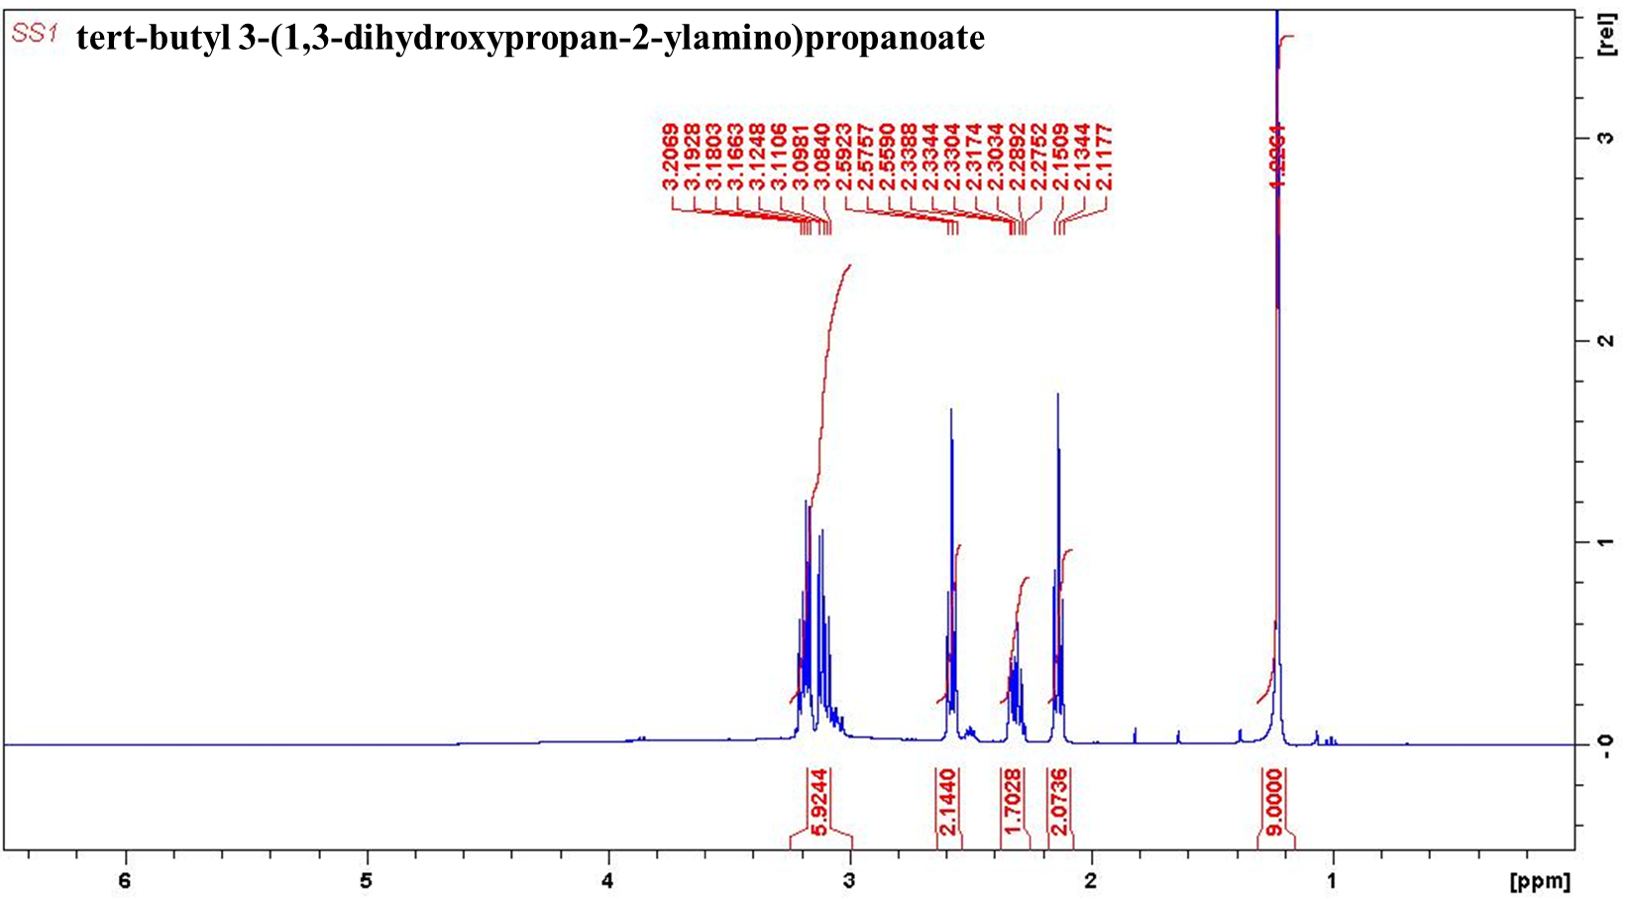


13C NMR characterization of compound 3


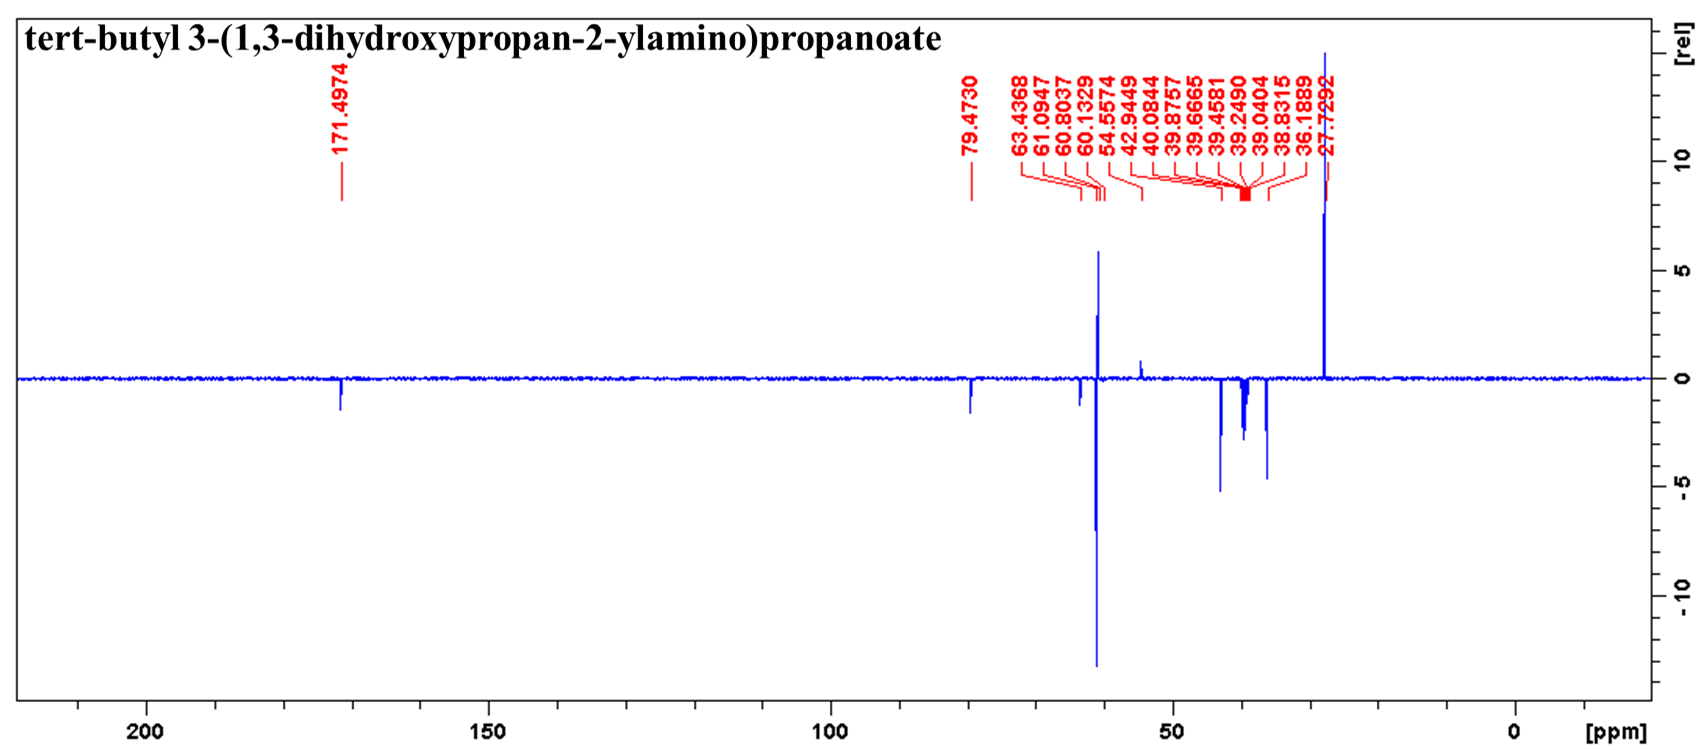


HRMS characterization of compound **3**


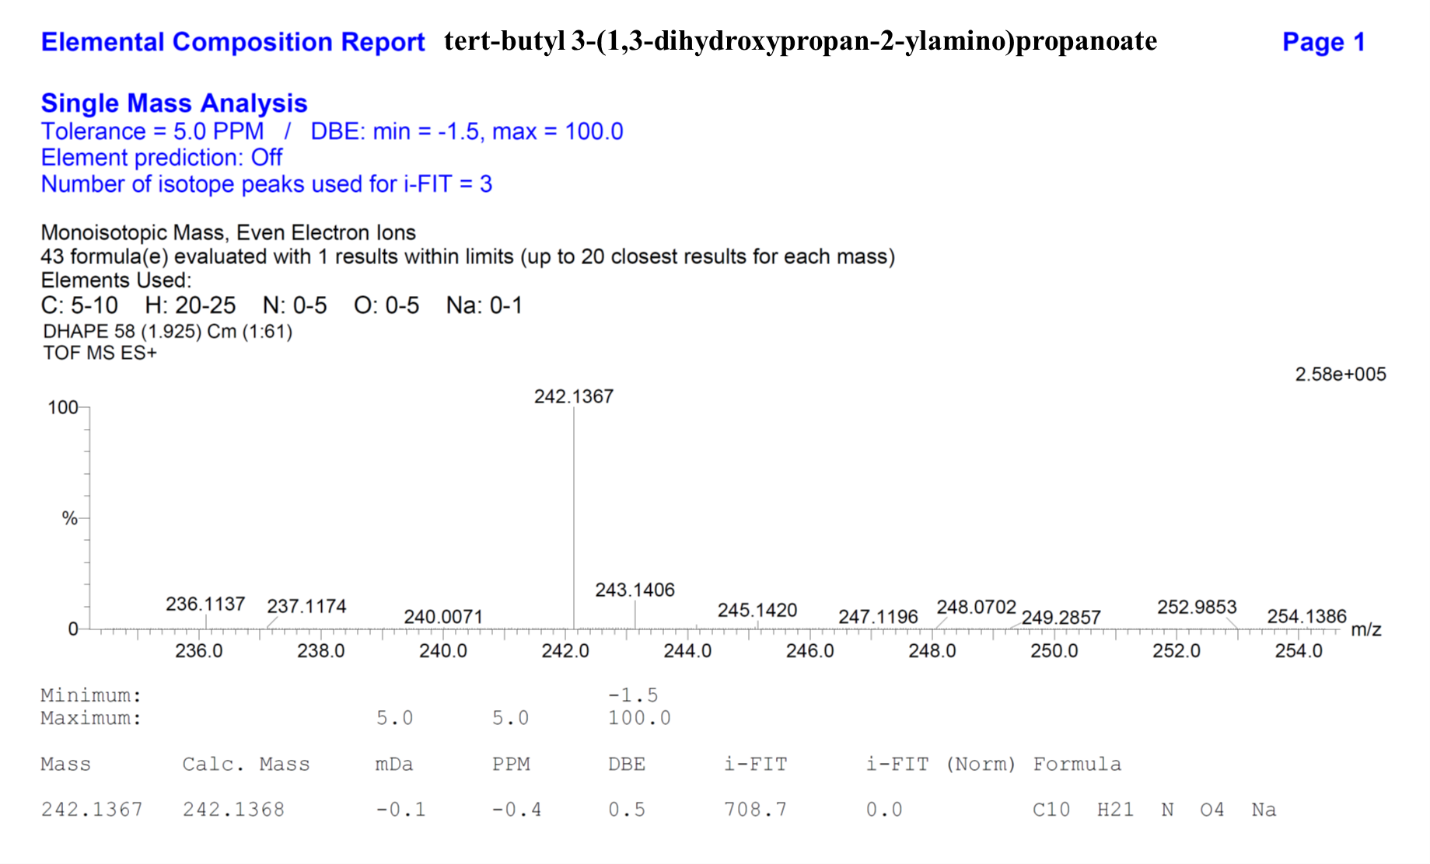


1H NMR characterization of compound 5a


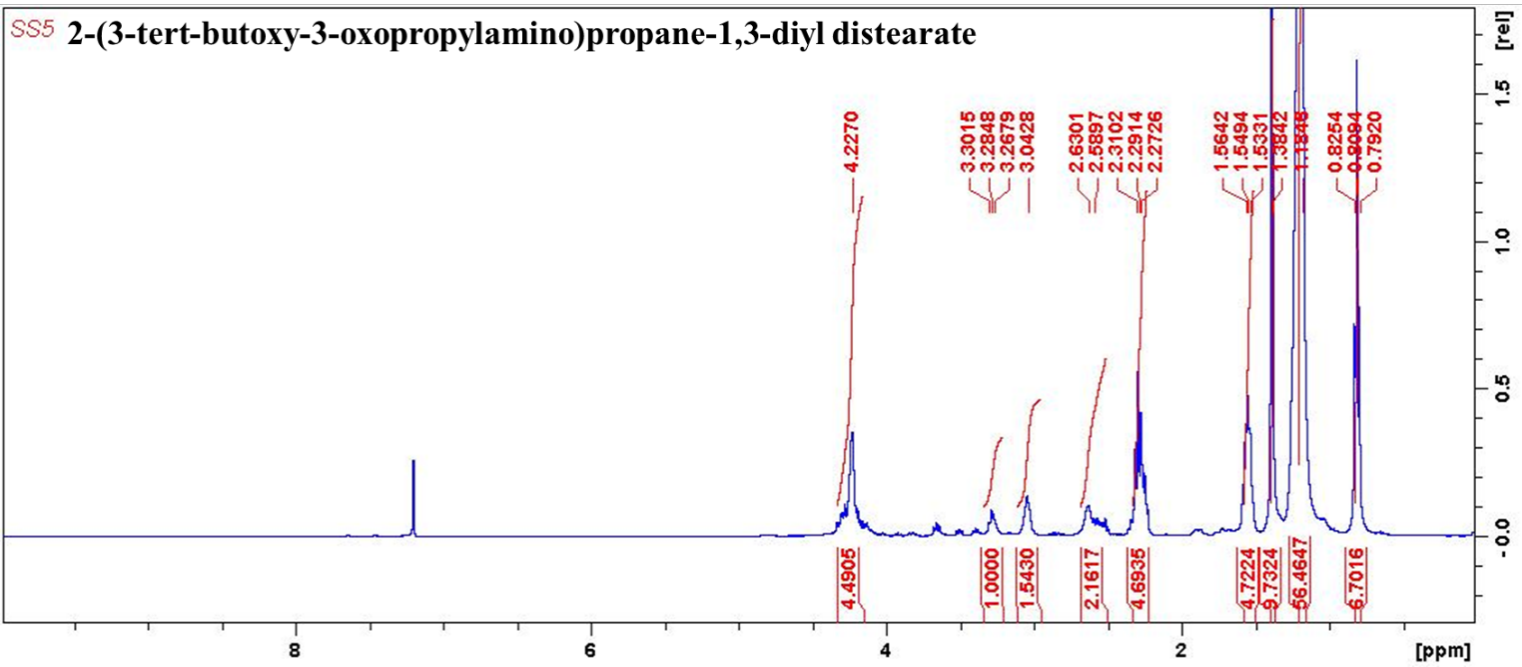


13C NMR characterization of compound 5a


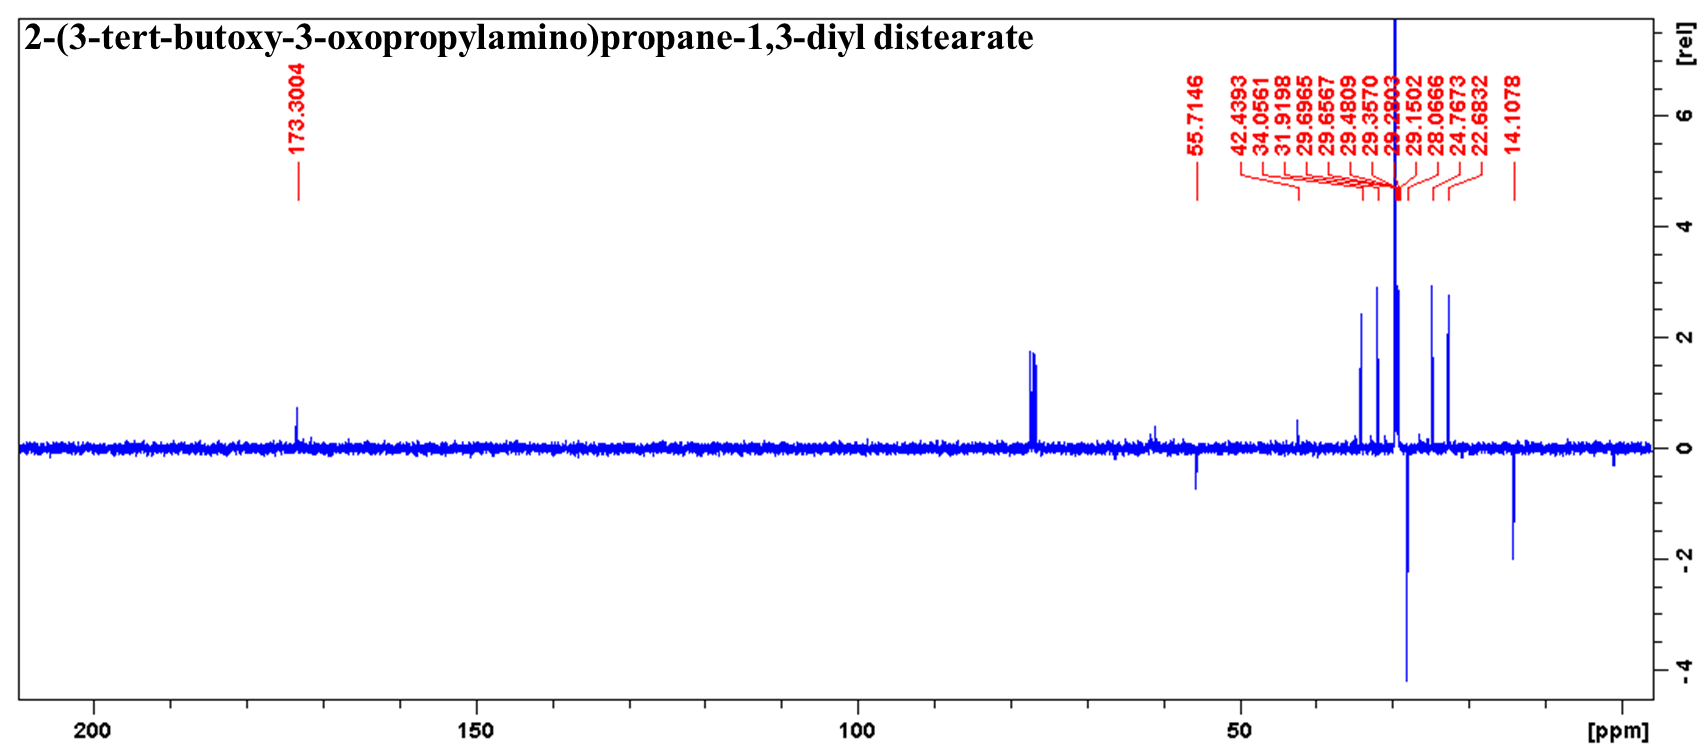


HRMS characterization of compound 5a


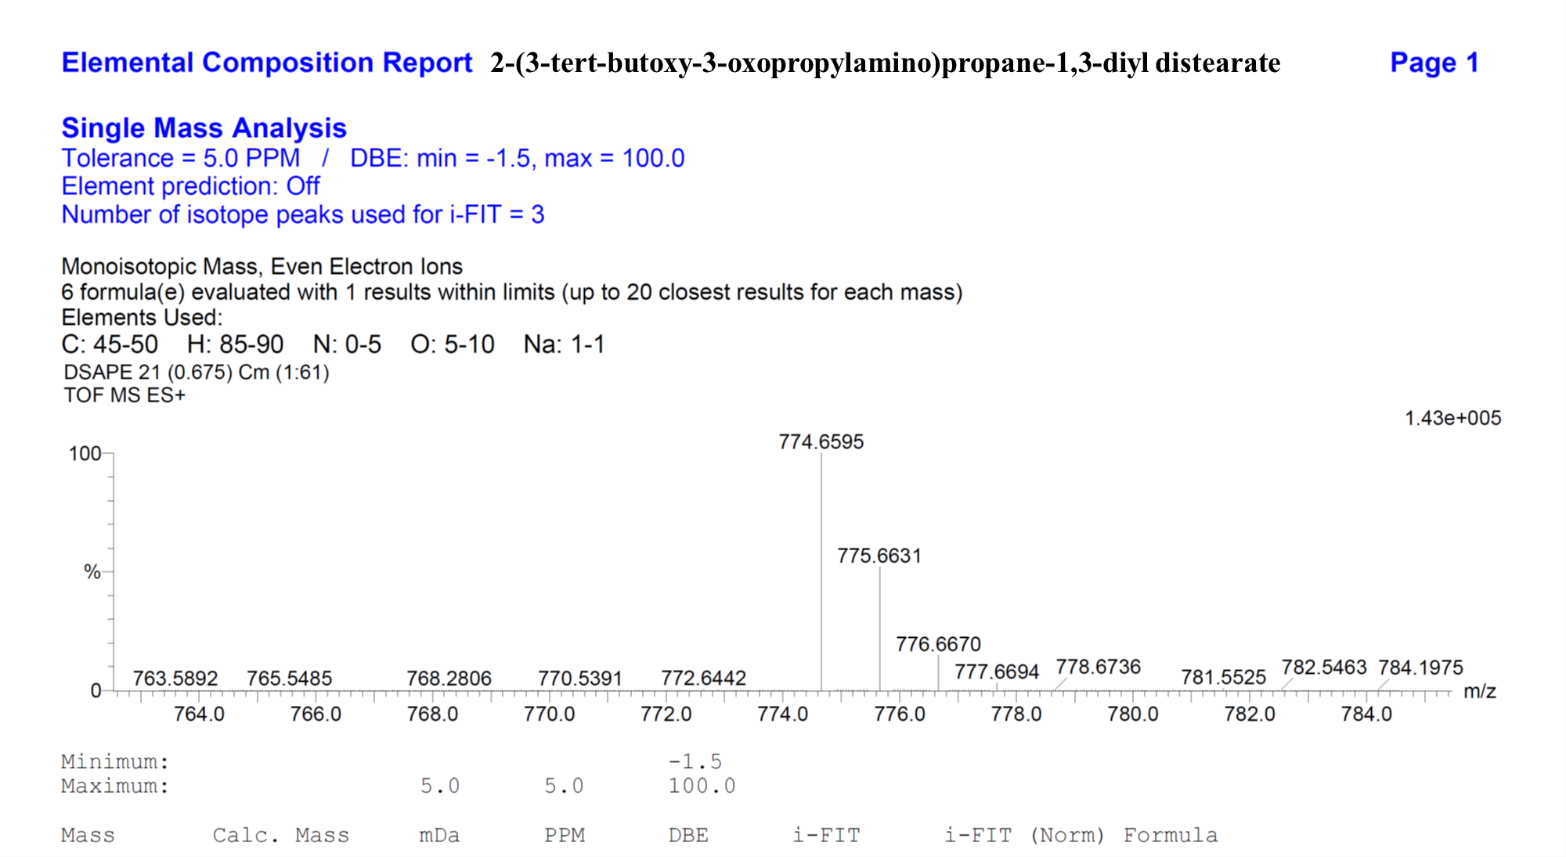


1H NMR characterization of compound 5b


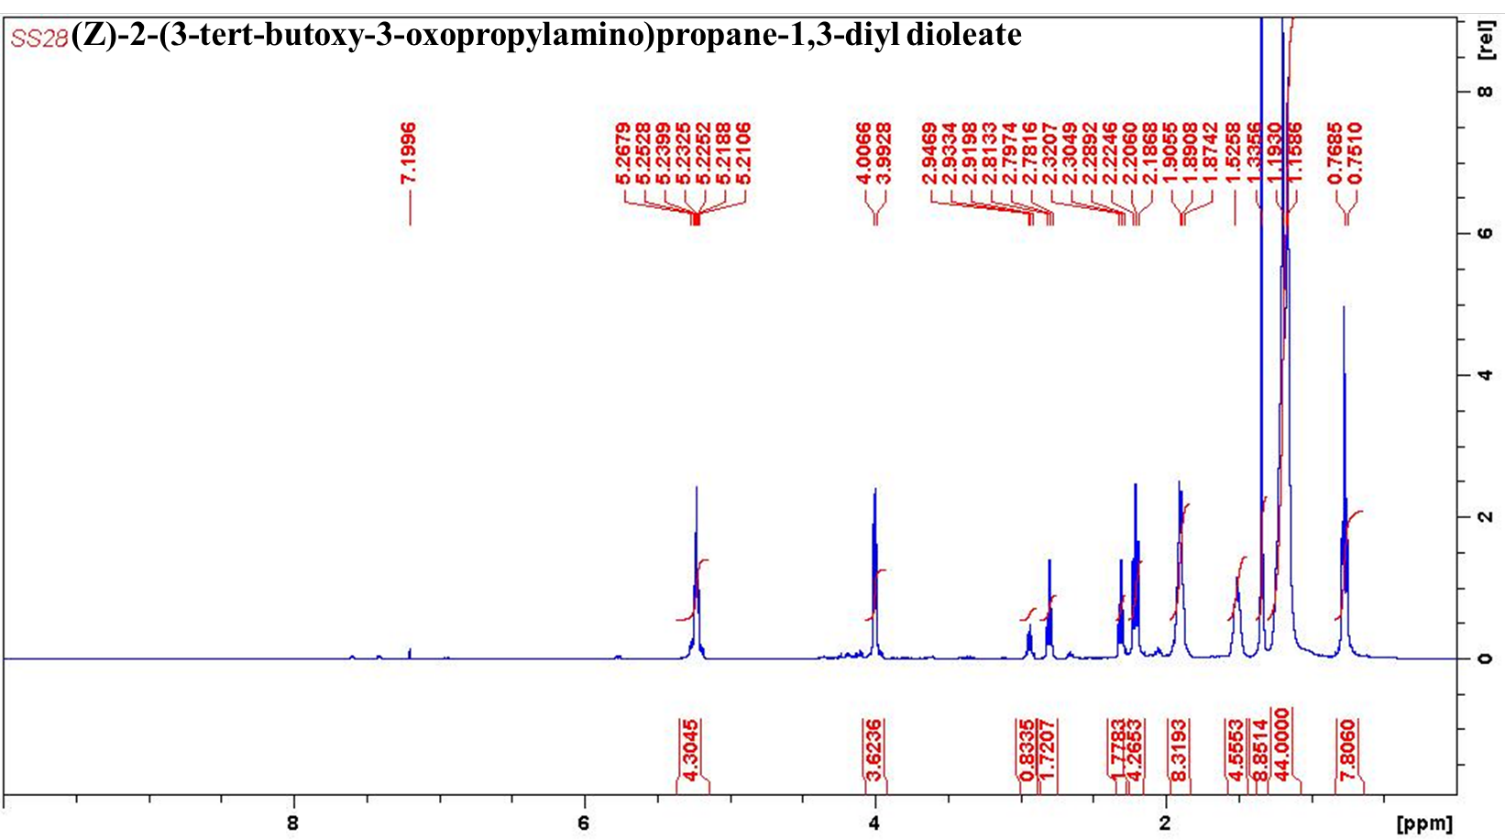


13C NMR characterization of compound 5b


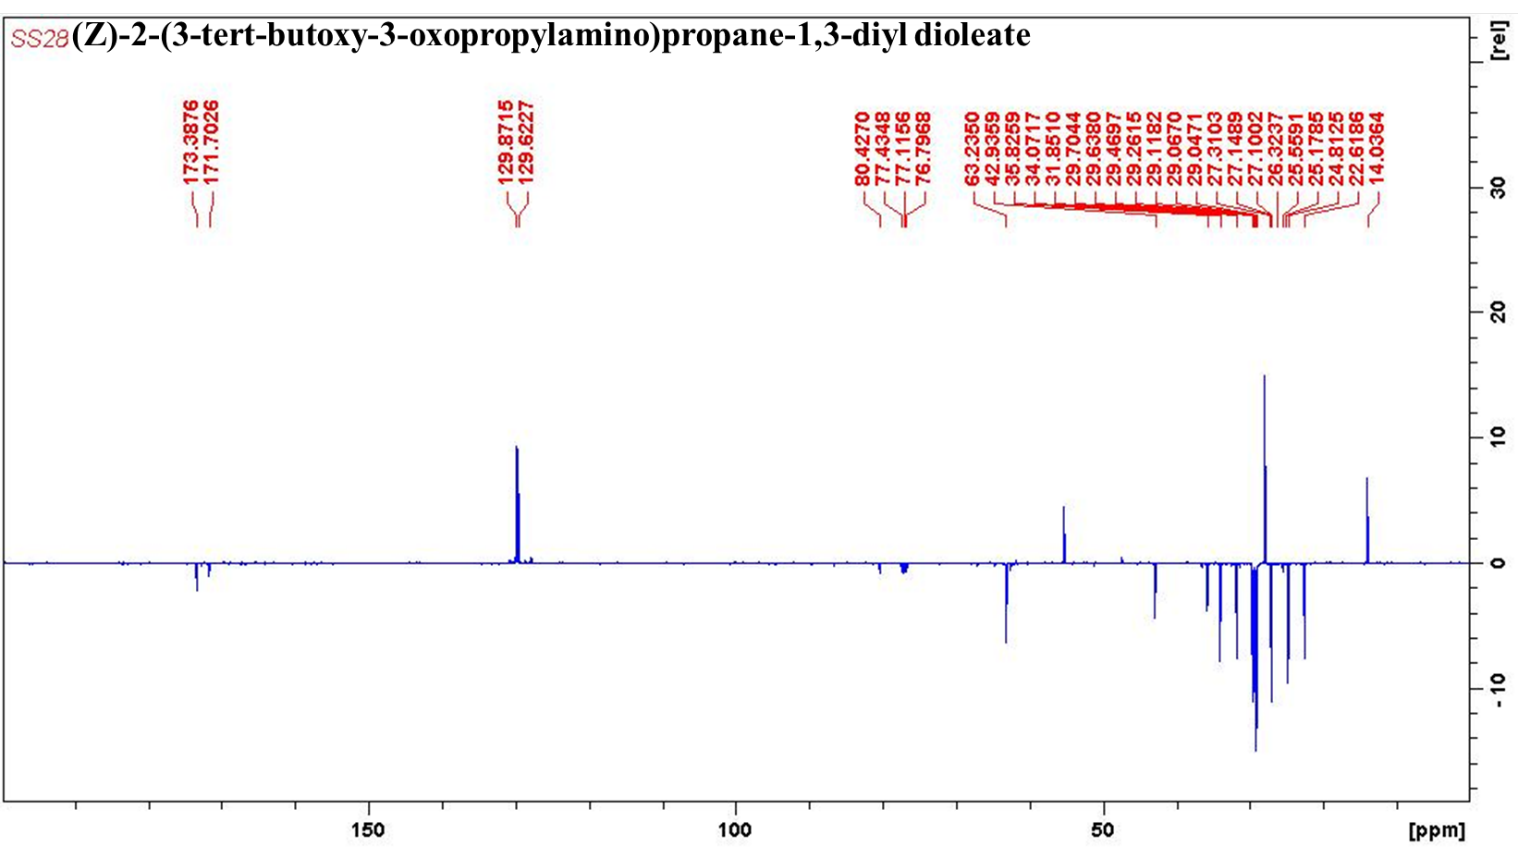


HRMS characterization of compound 5b


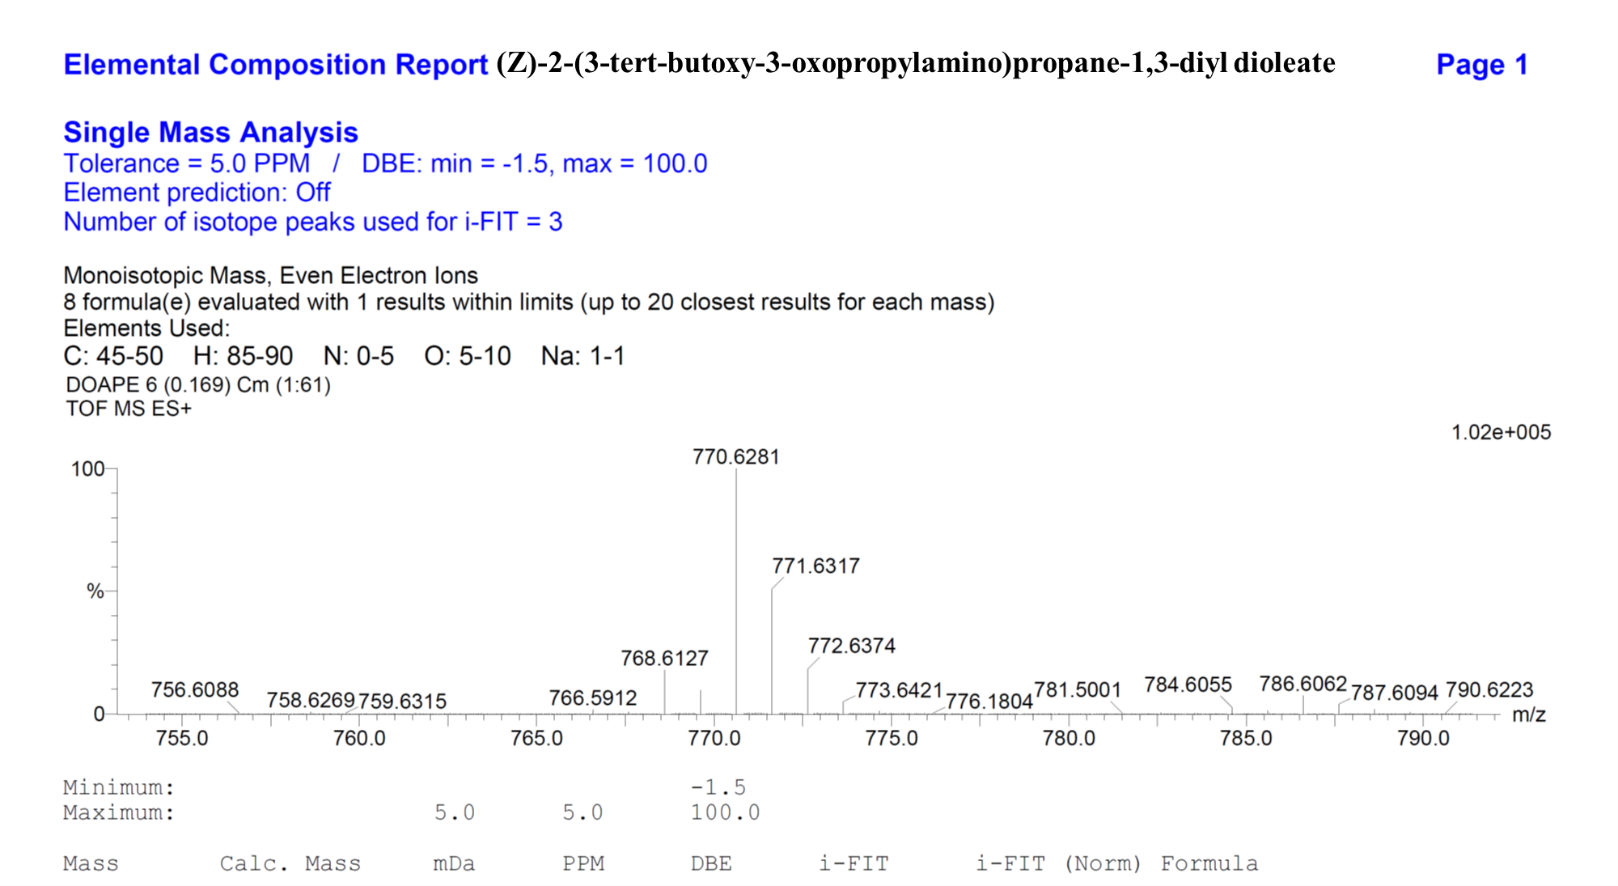


1H NMR characterization of compound 5c


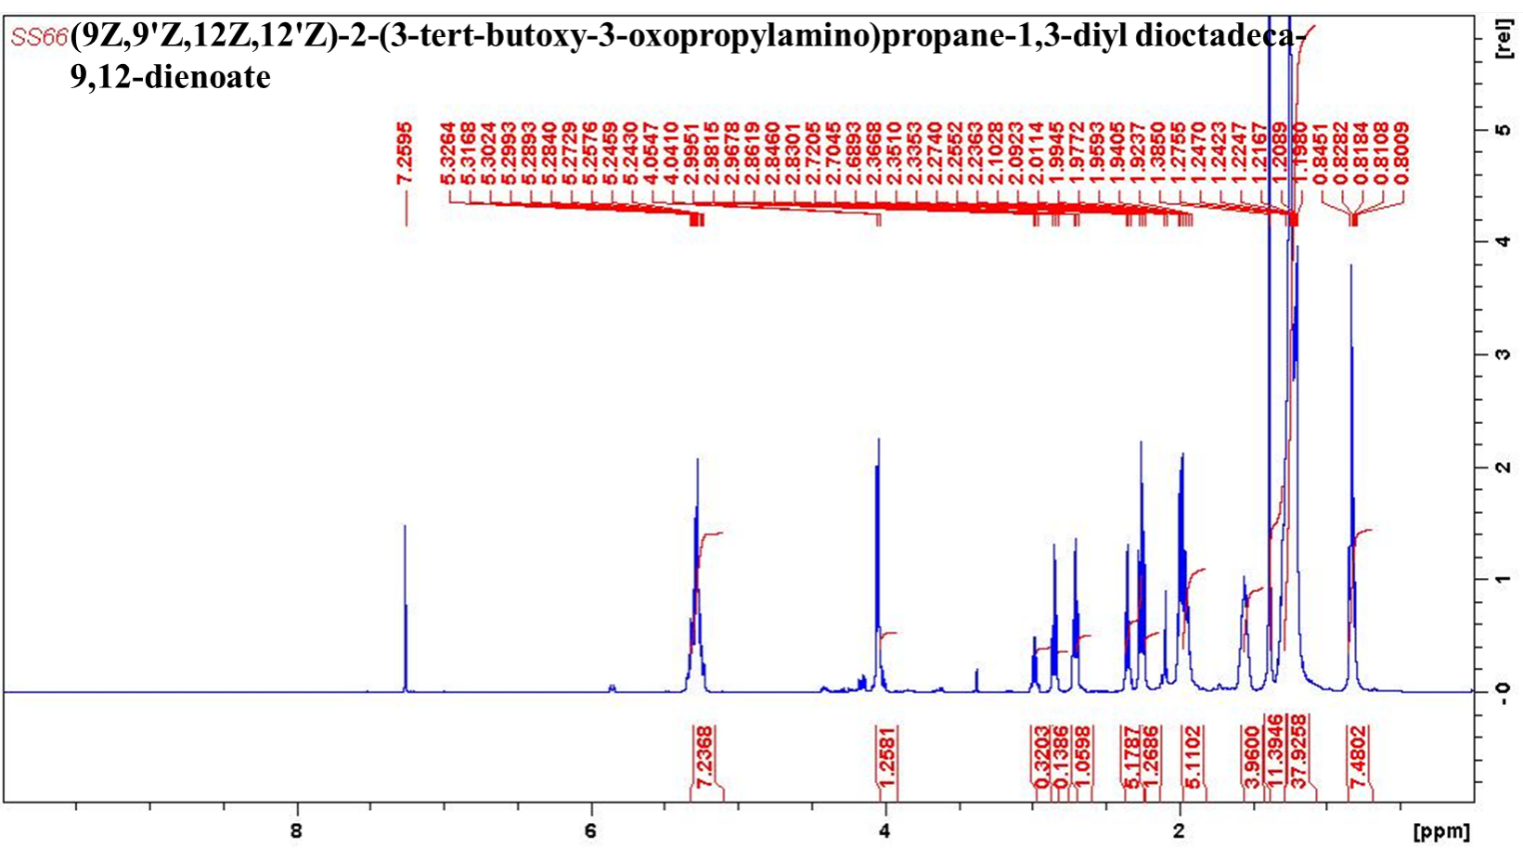


13C NMR characterization of compound 5c


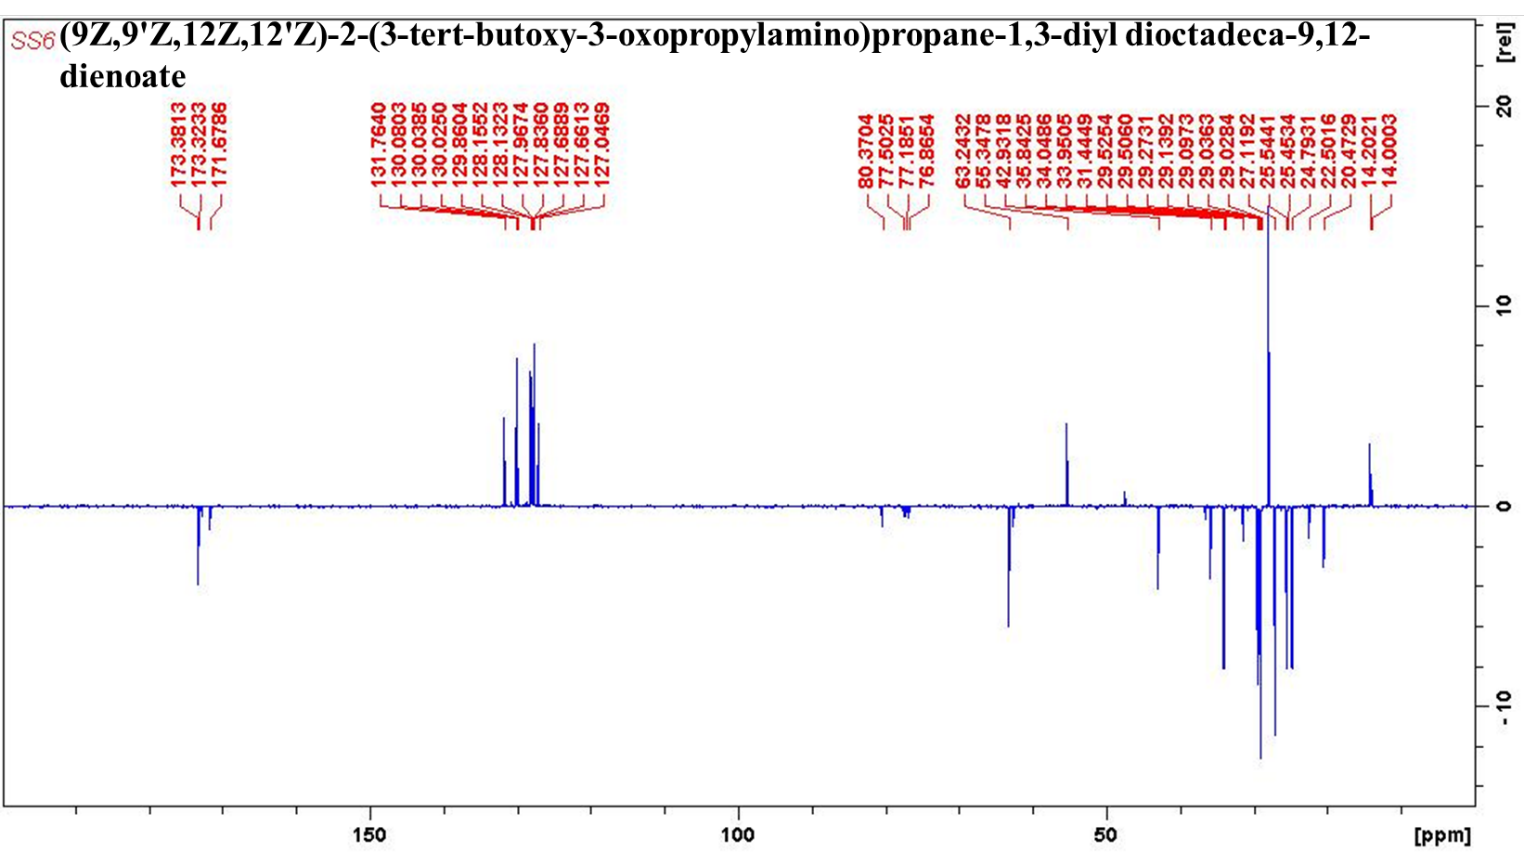


HRMS characterization of compound 5c


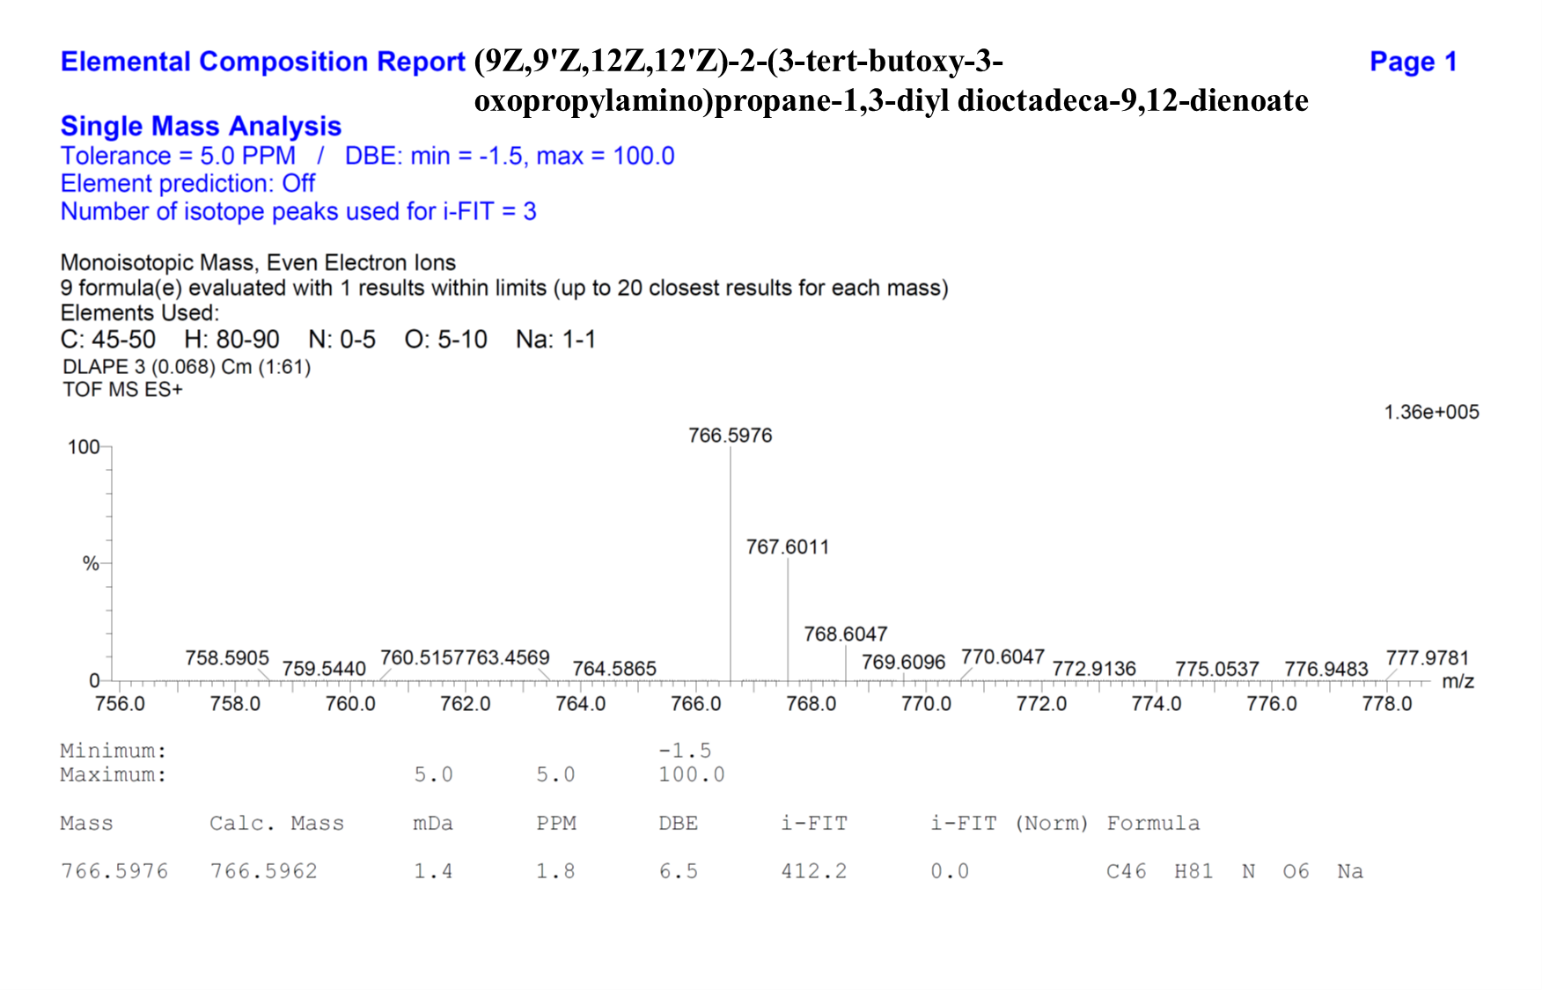


1H NMR characterization of compound 5d


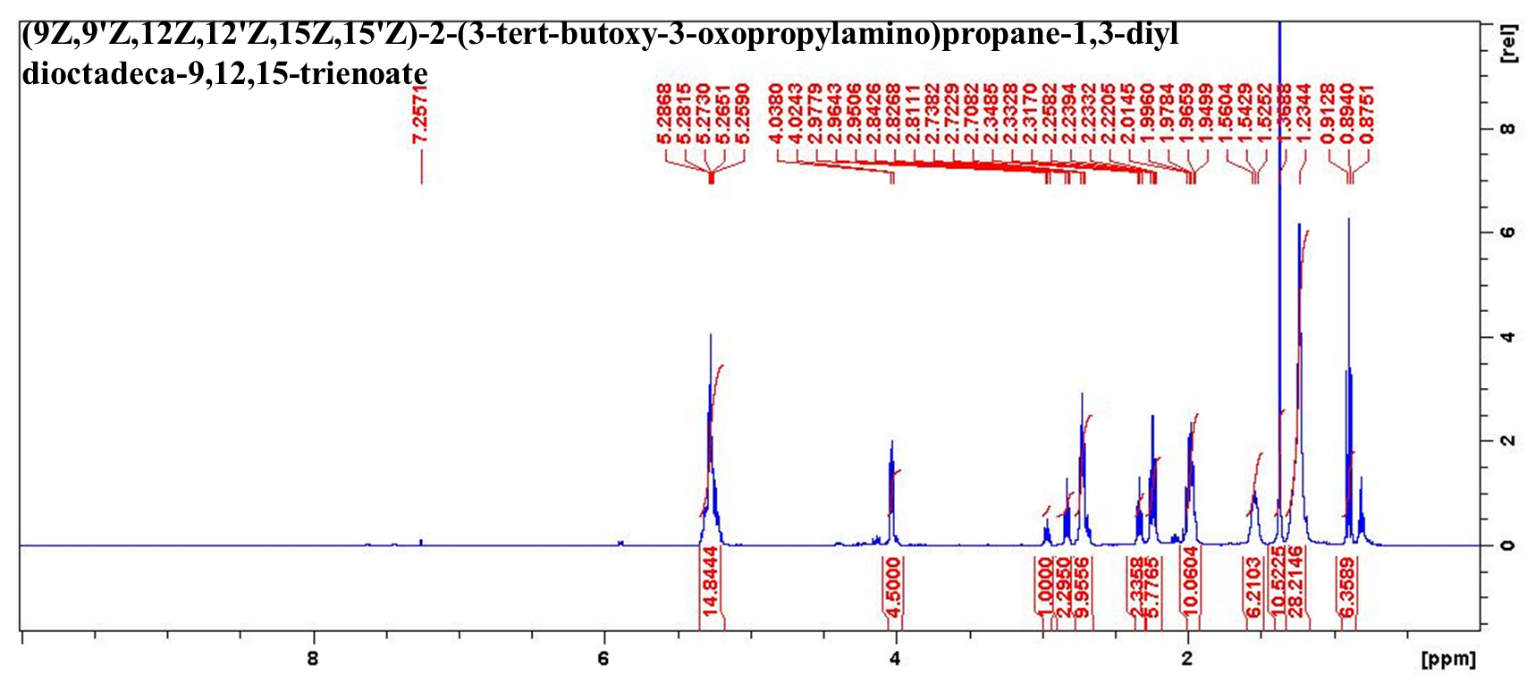


13C NMR characterization of compound 5d


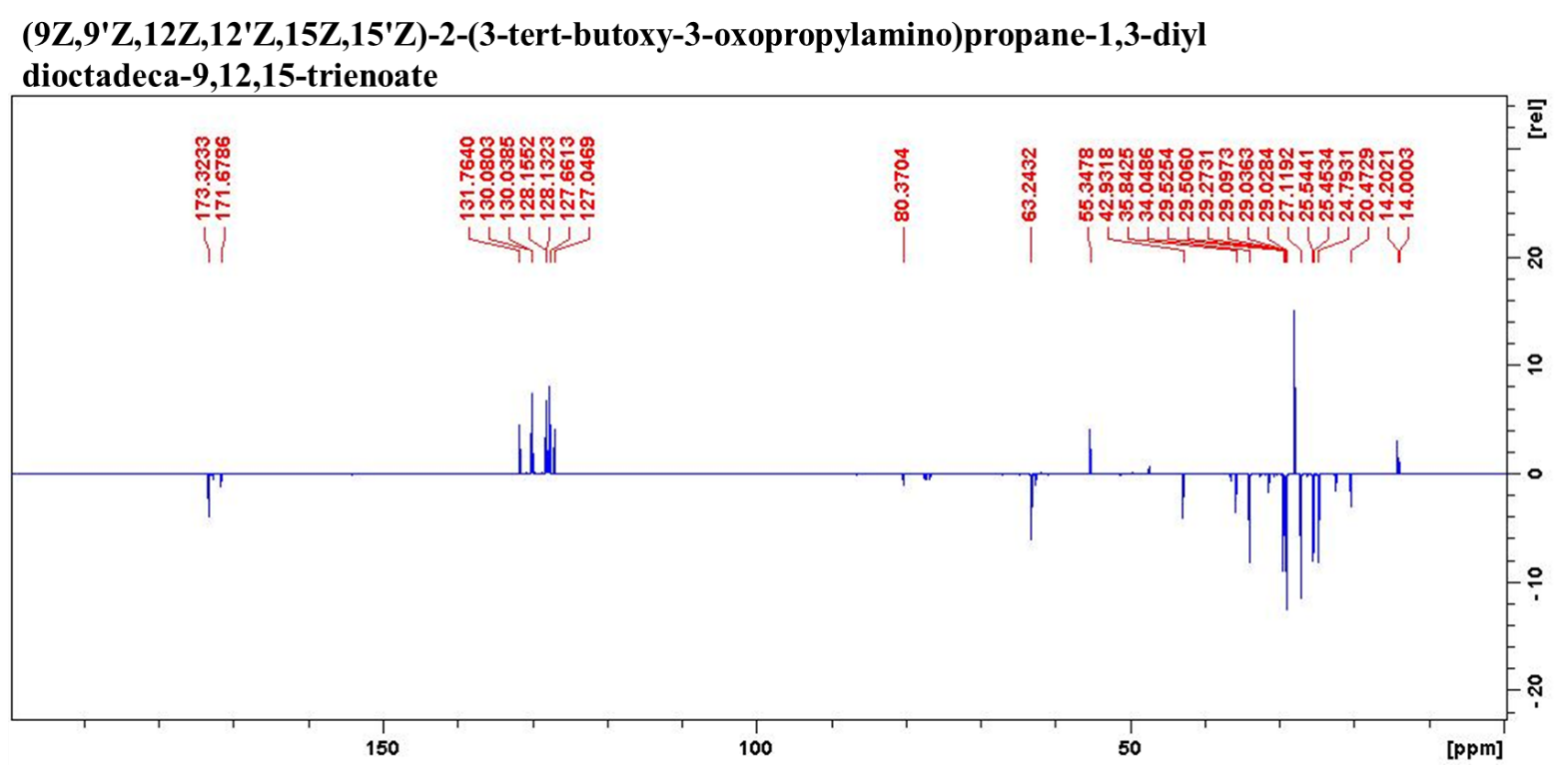


HRMS characterization of compound 5d


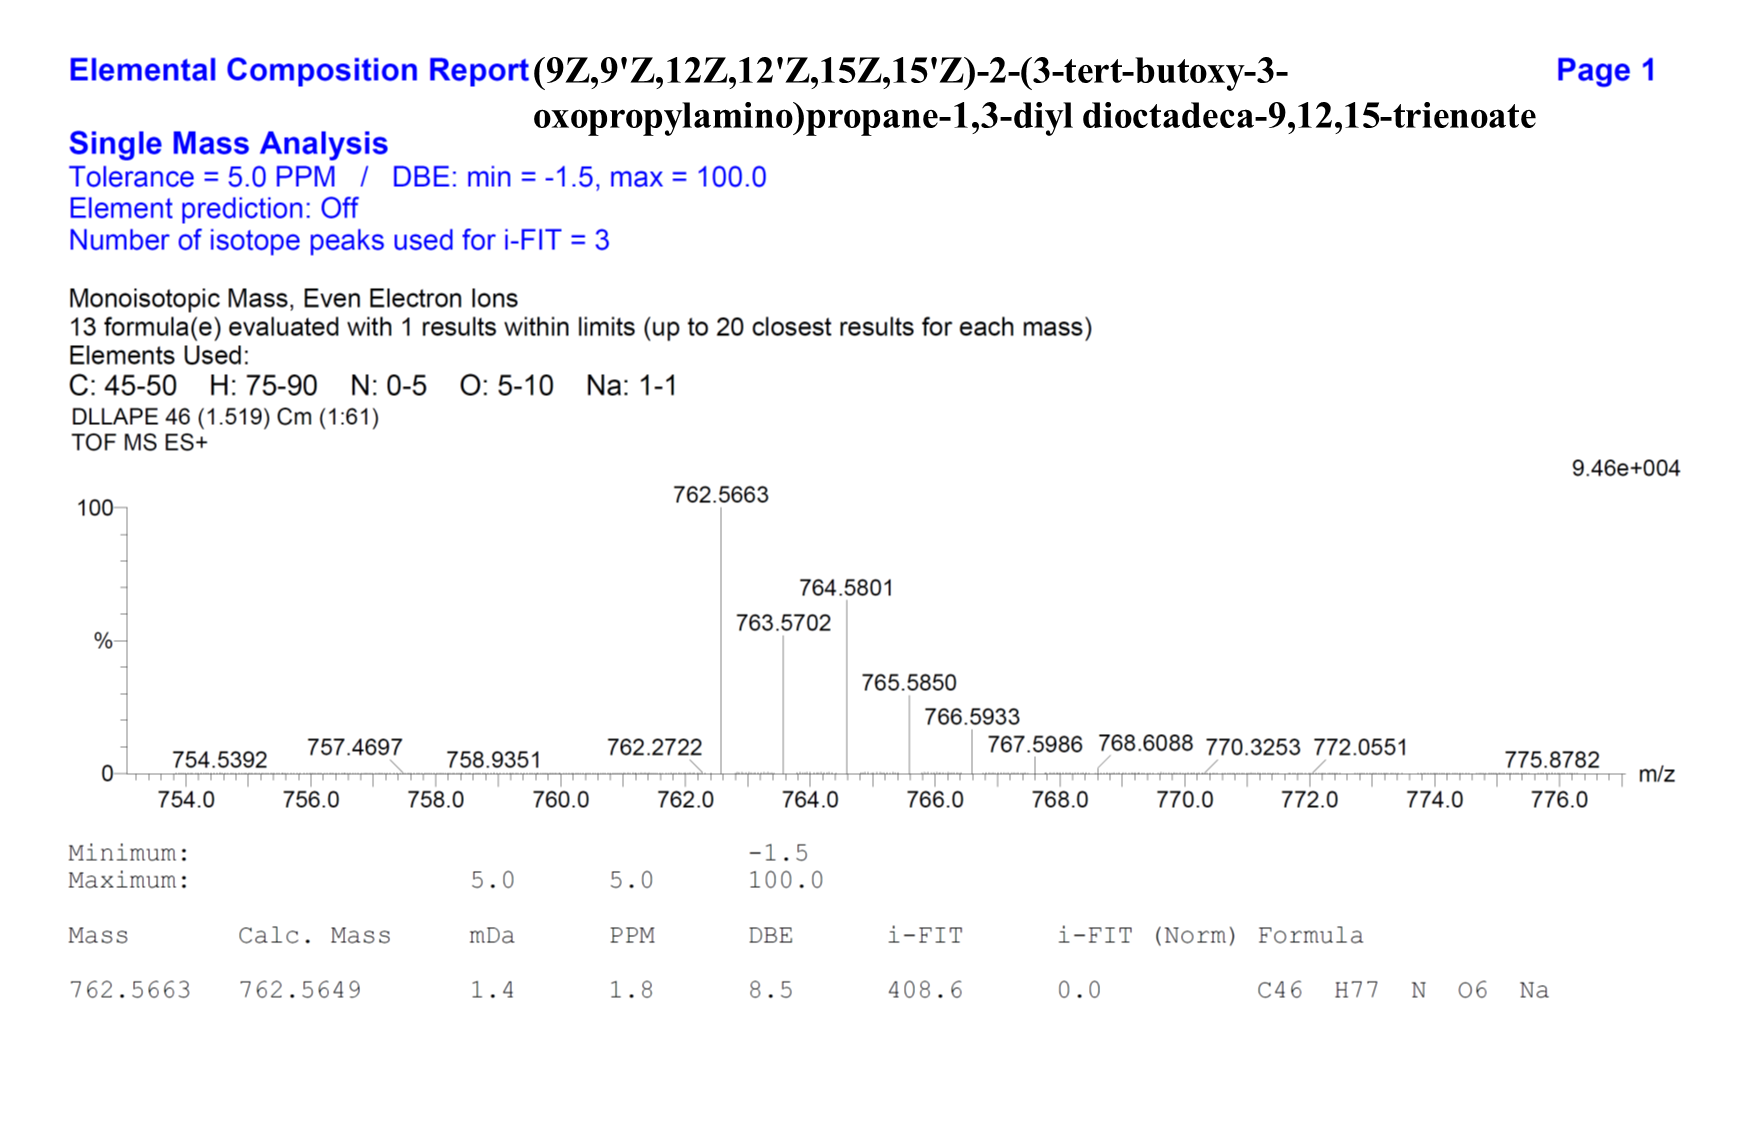


FTIR characterization of compound 6a


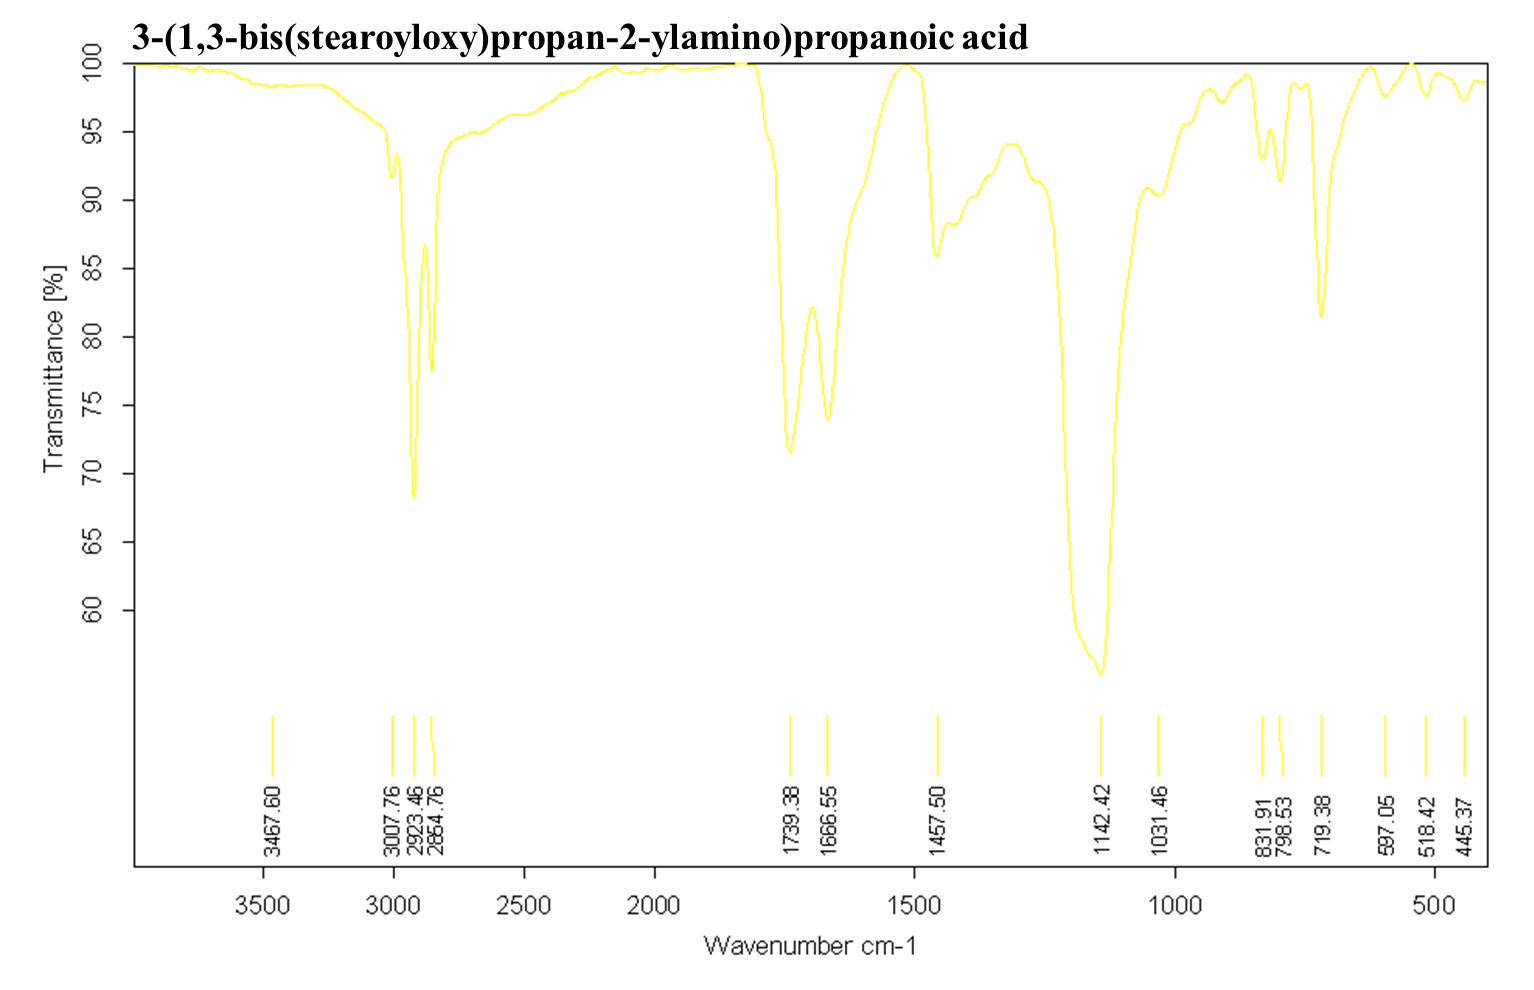


1H NMR characterization of compound 6a


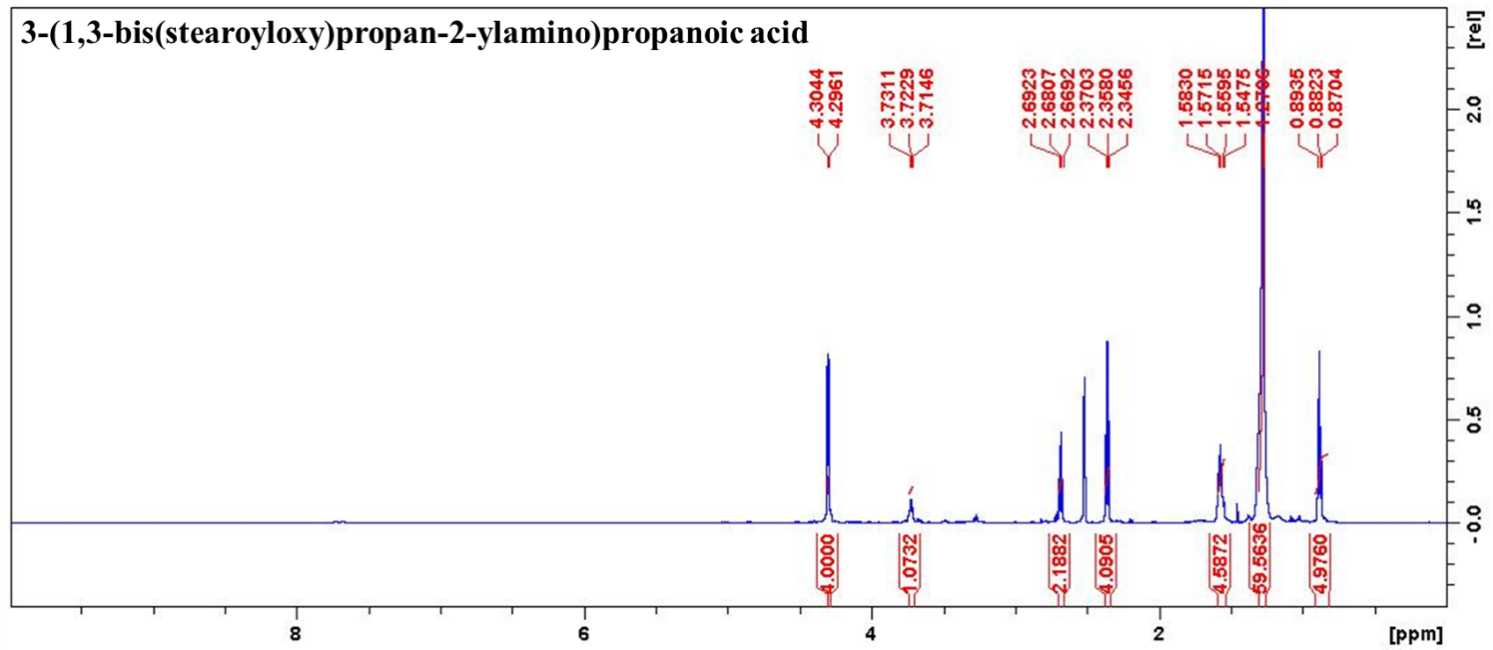


13C NMR characterization of compound 6a


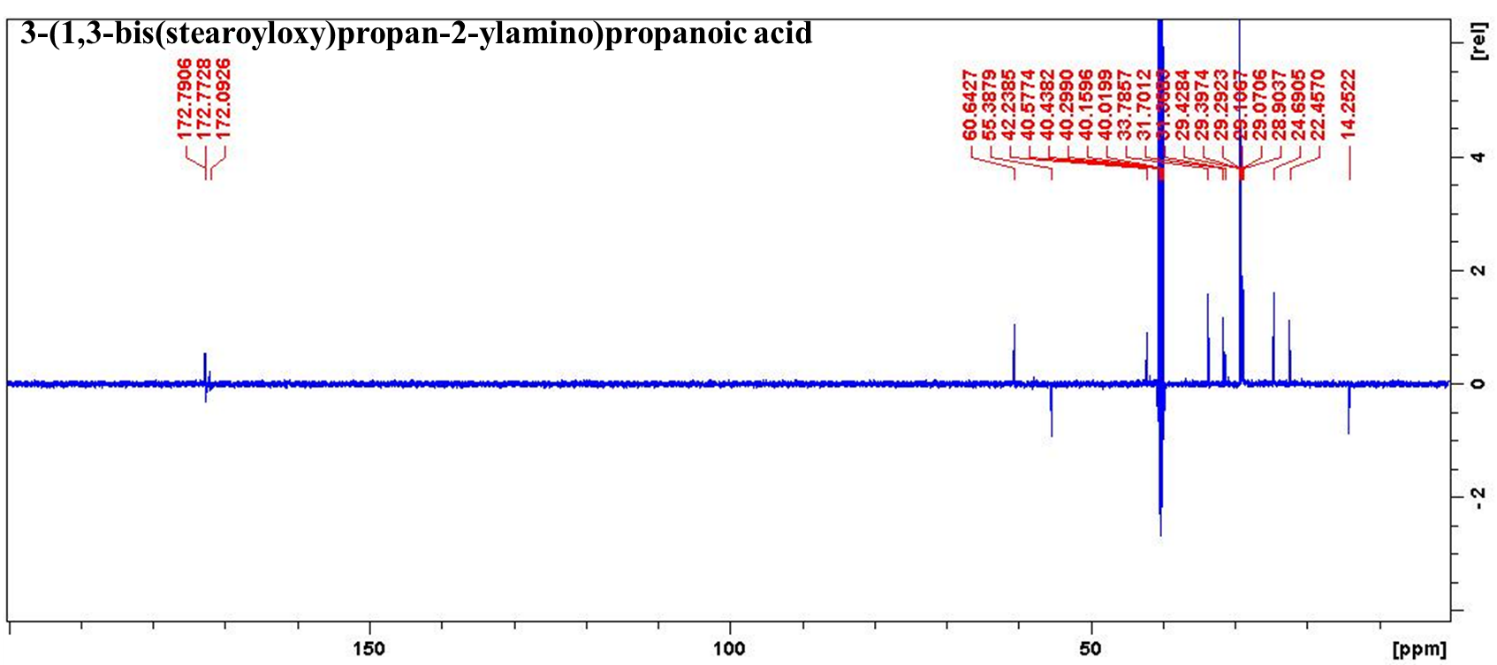


HRMS characterization of Compound 6a


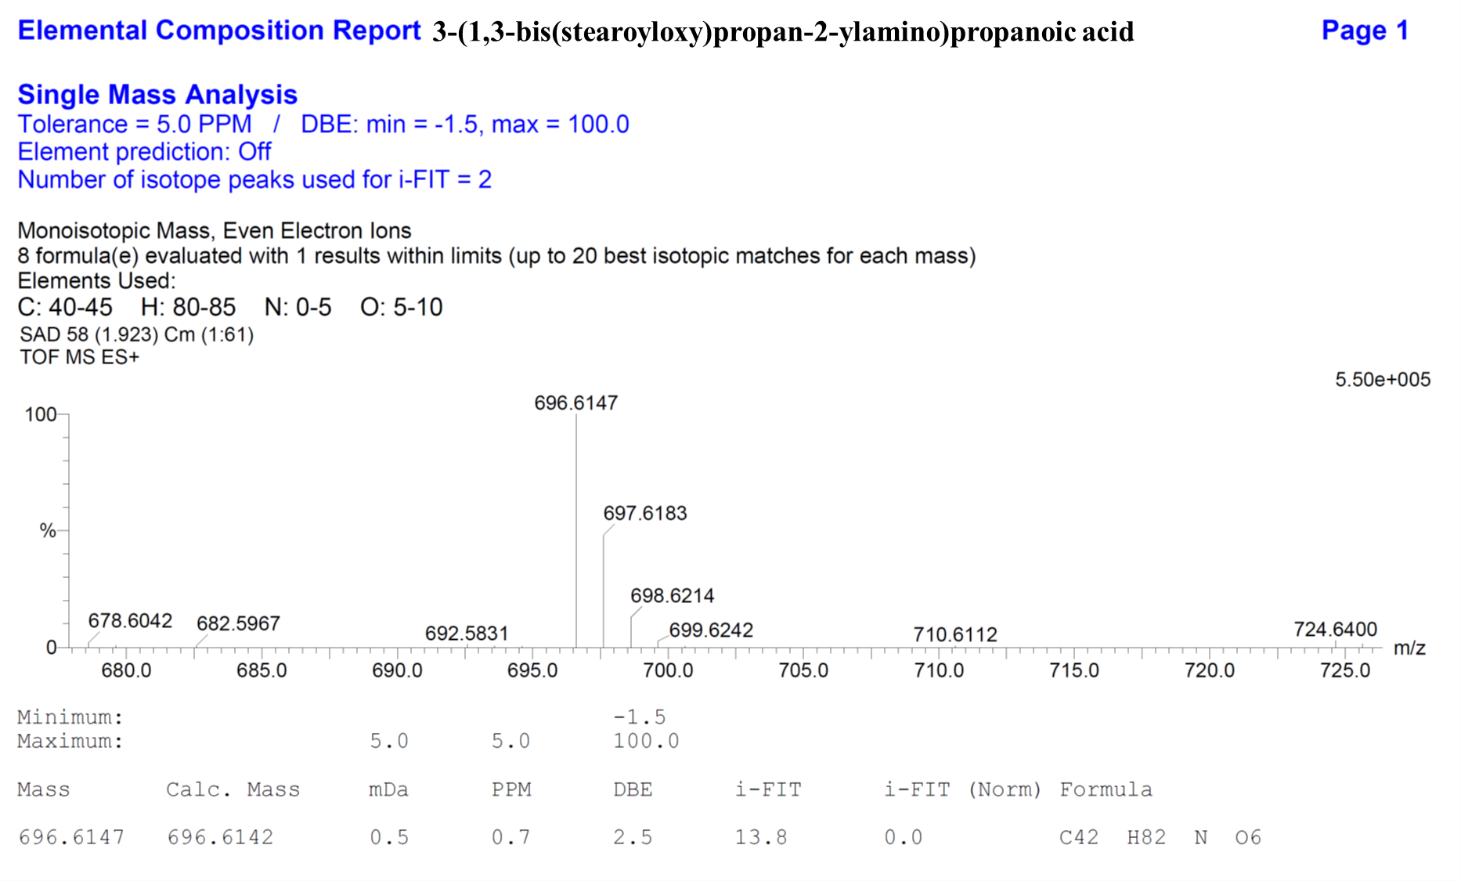


FTIR characterization of compound 6b
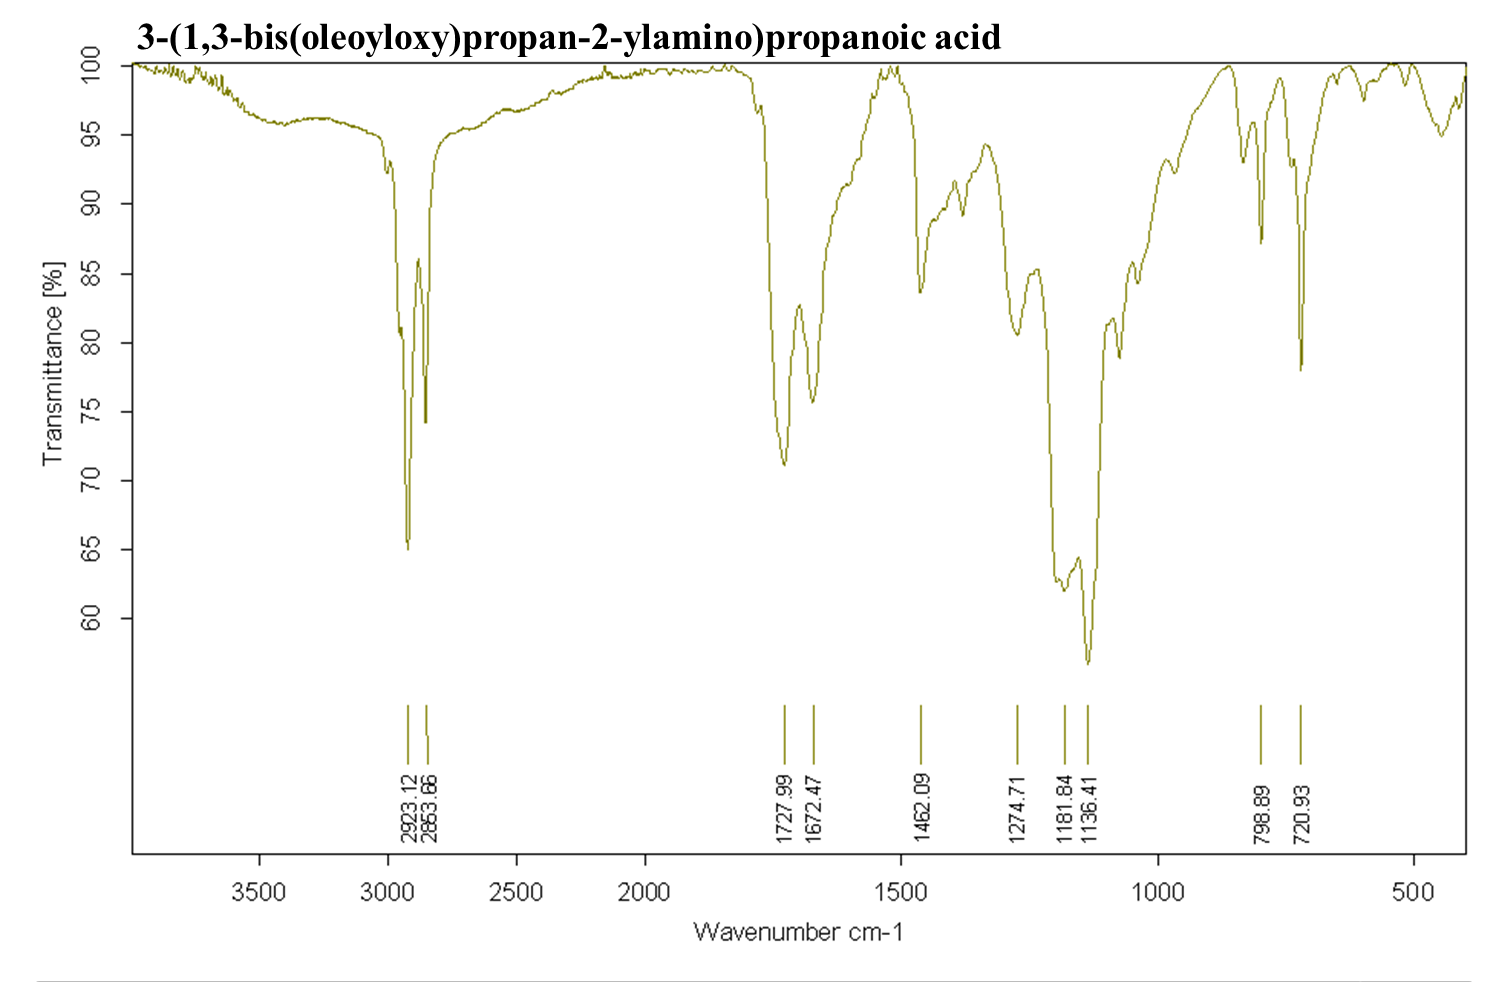
1H NMR characterization of compound 6b


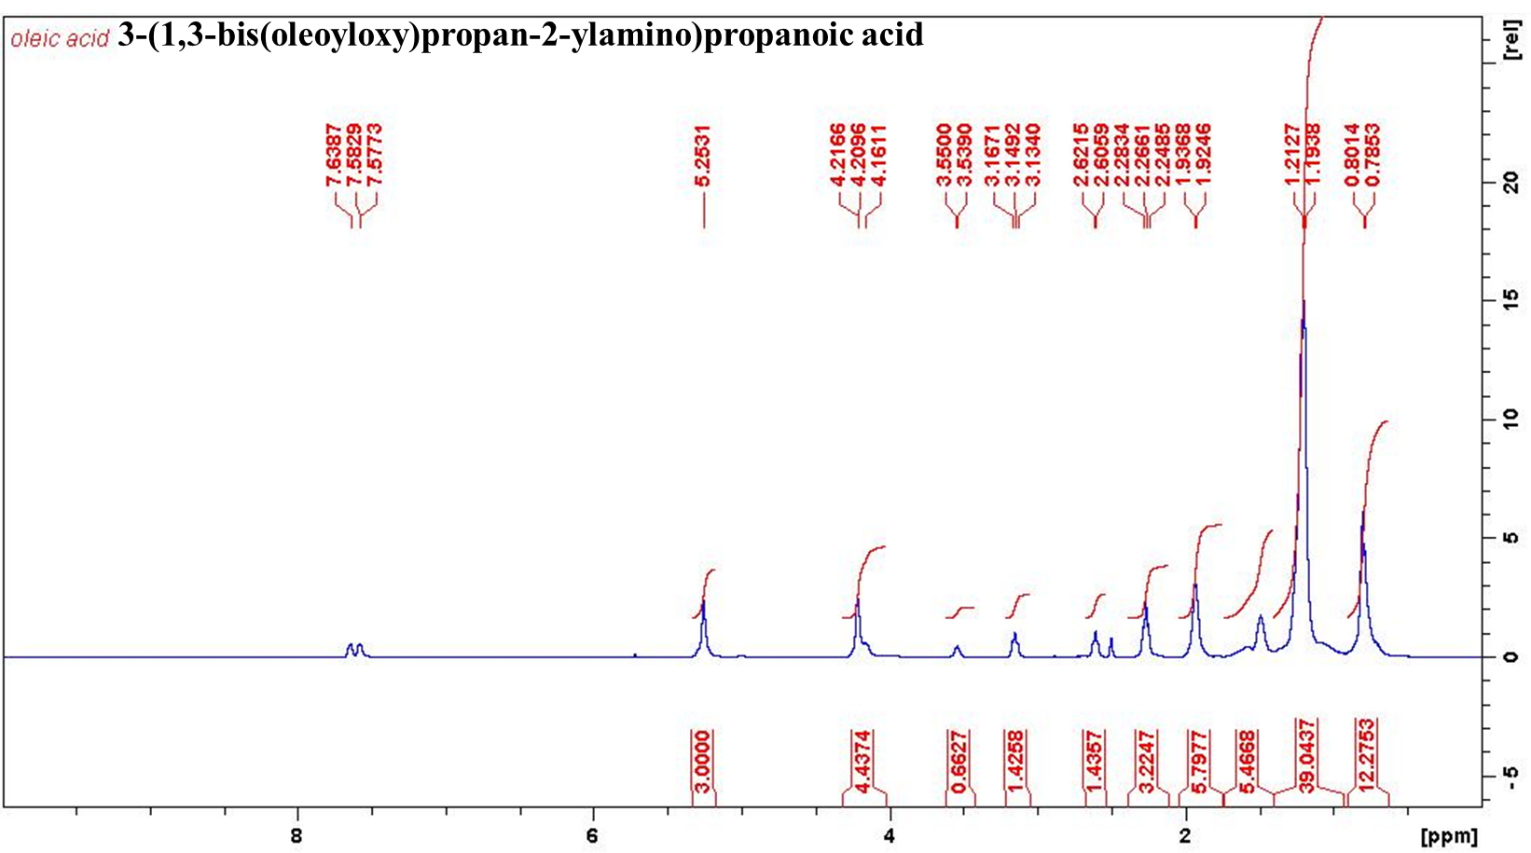


13C NMR characterization of compound 6b


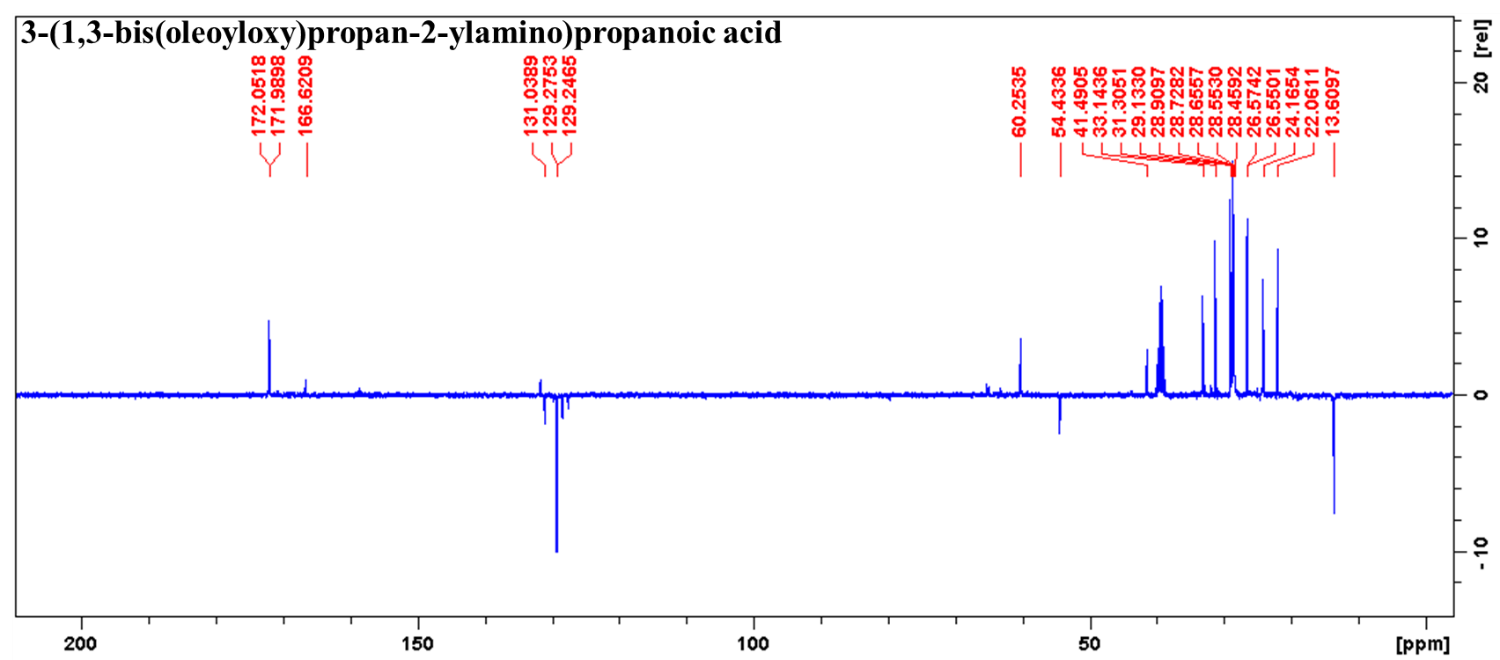


HRMS characterization of Compound 6b


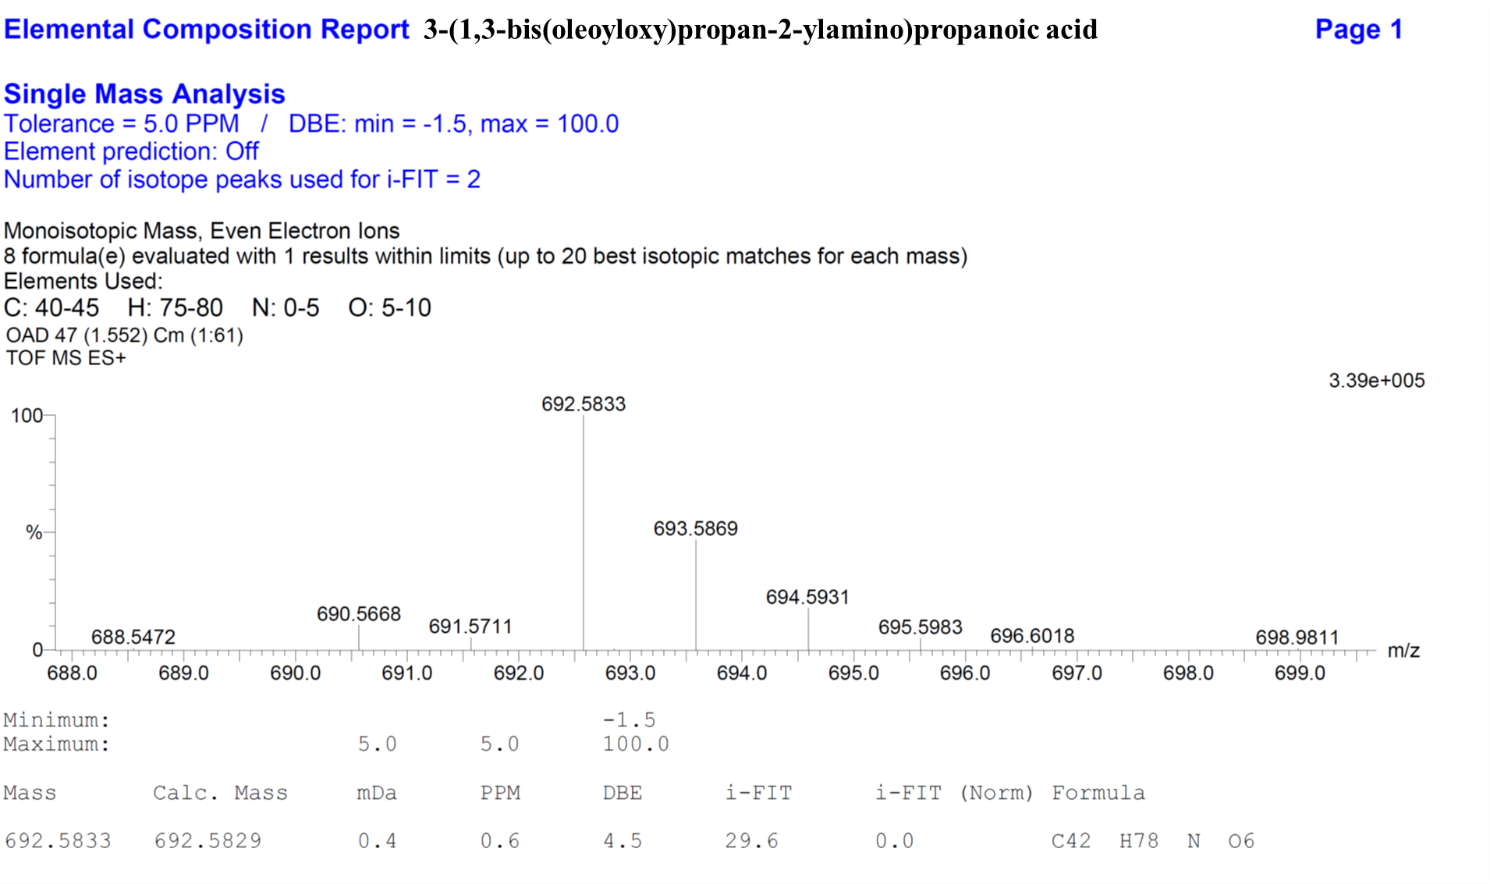


FTIR characterization of compound 6c


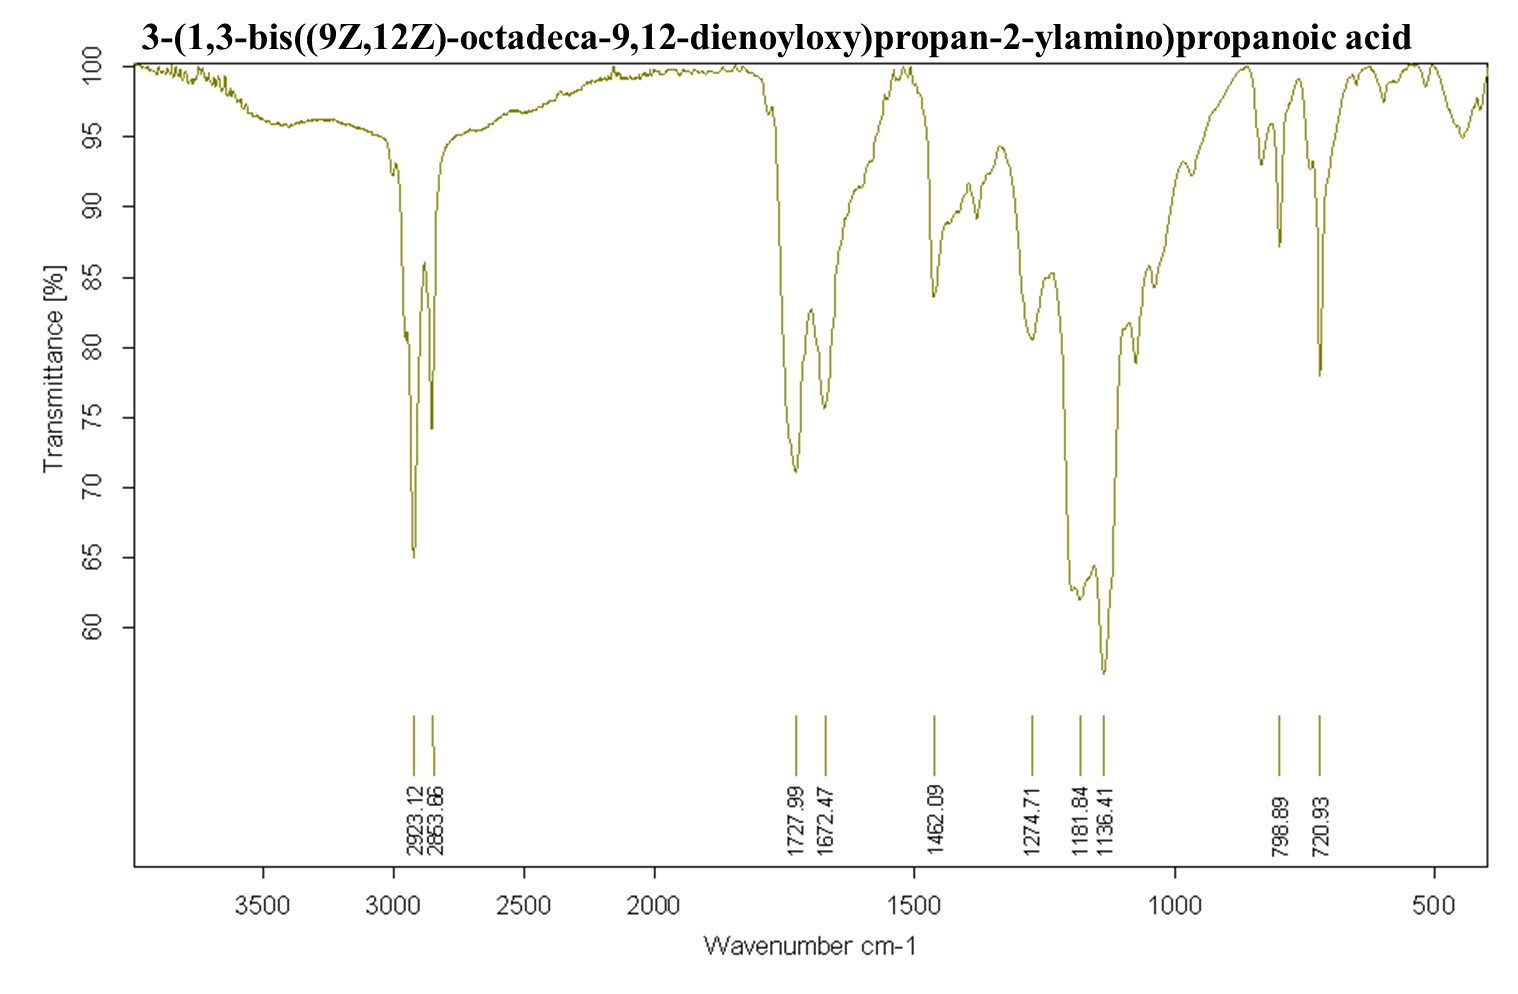
1H NMR characterization of compound 6c


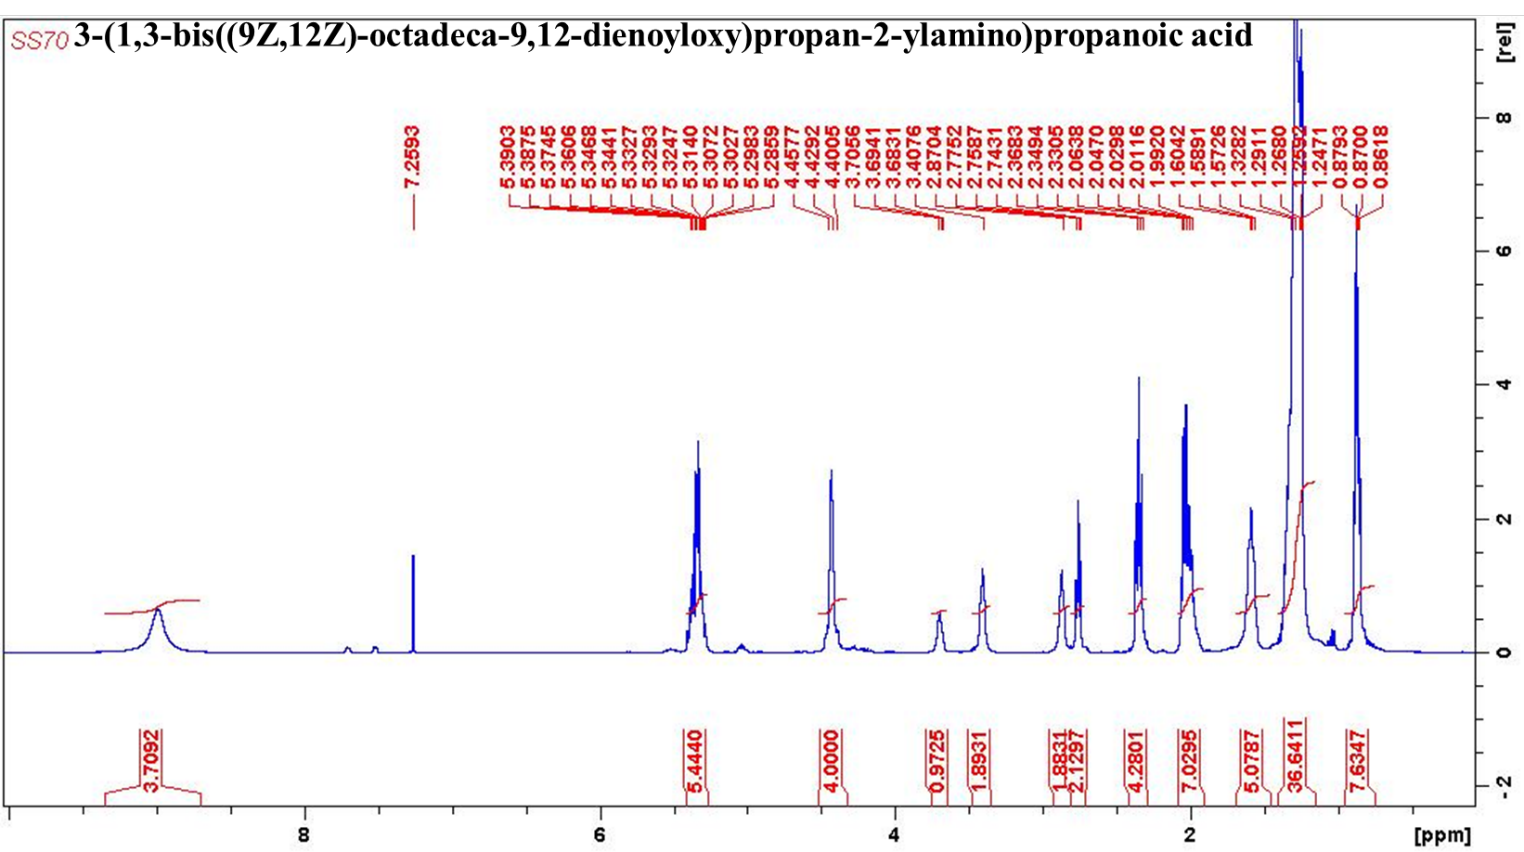


13C NMR characterization of compound 6c


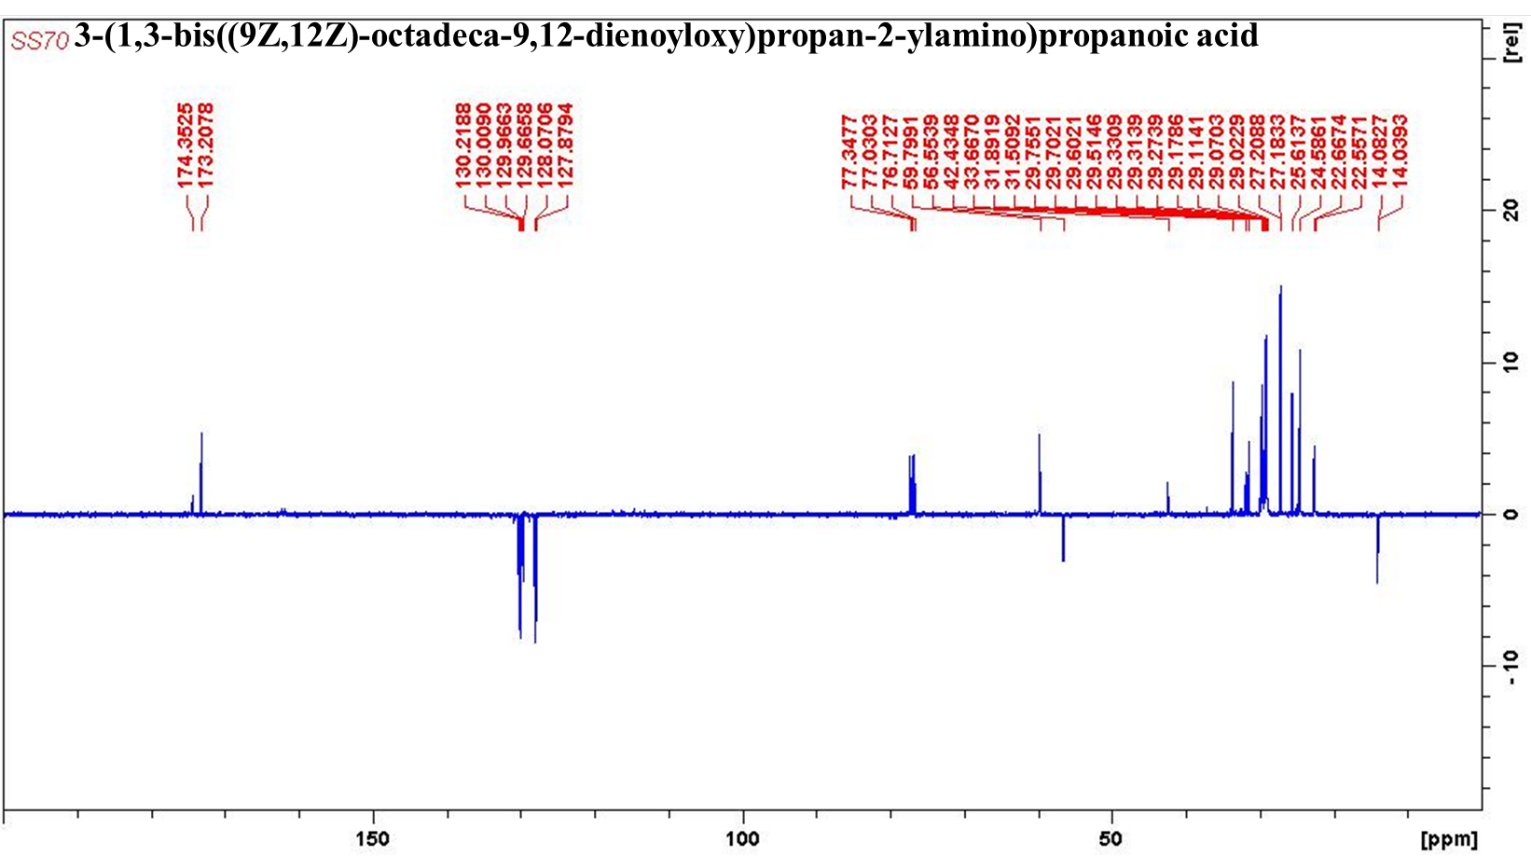


HRMS characterization of Compound 6c


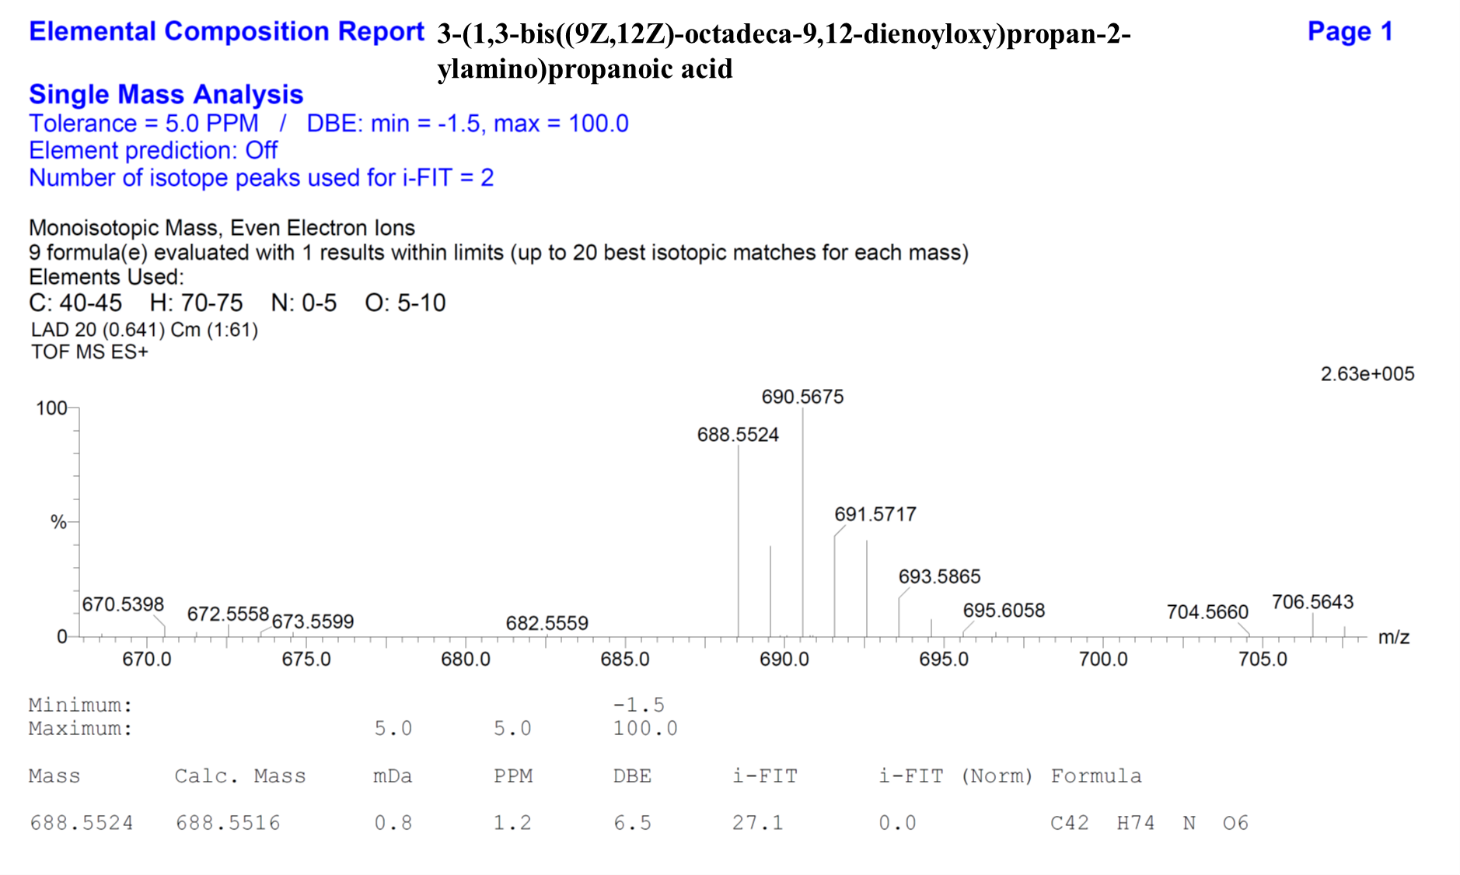


FTIR characterization of compound 6d


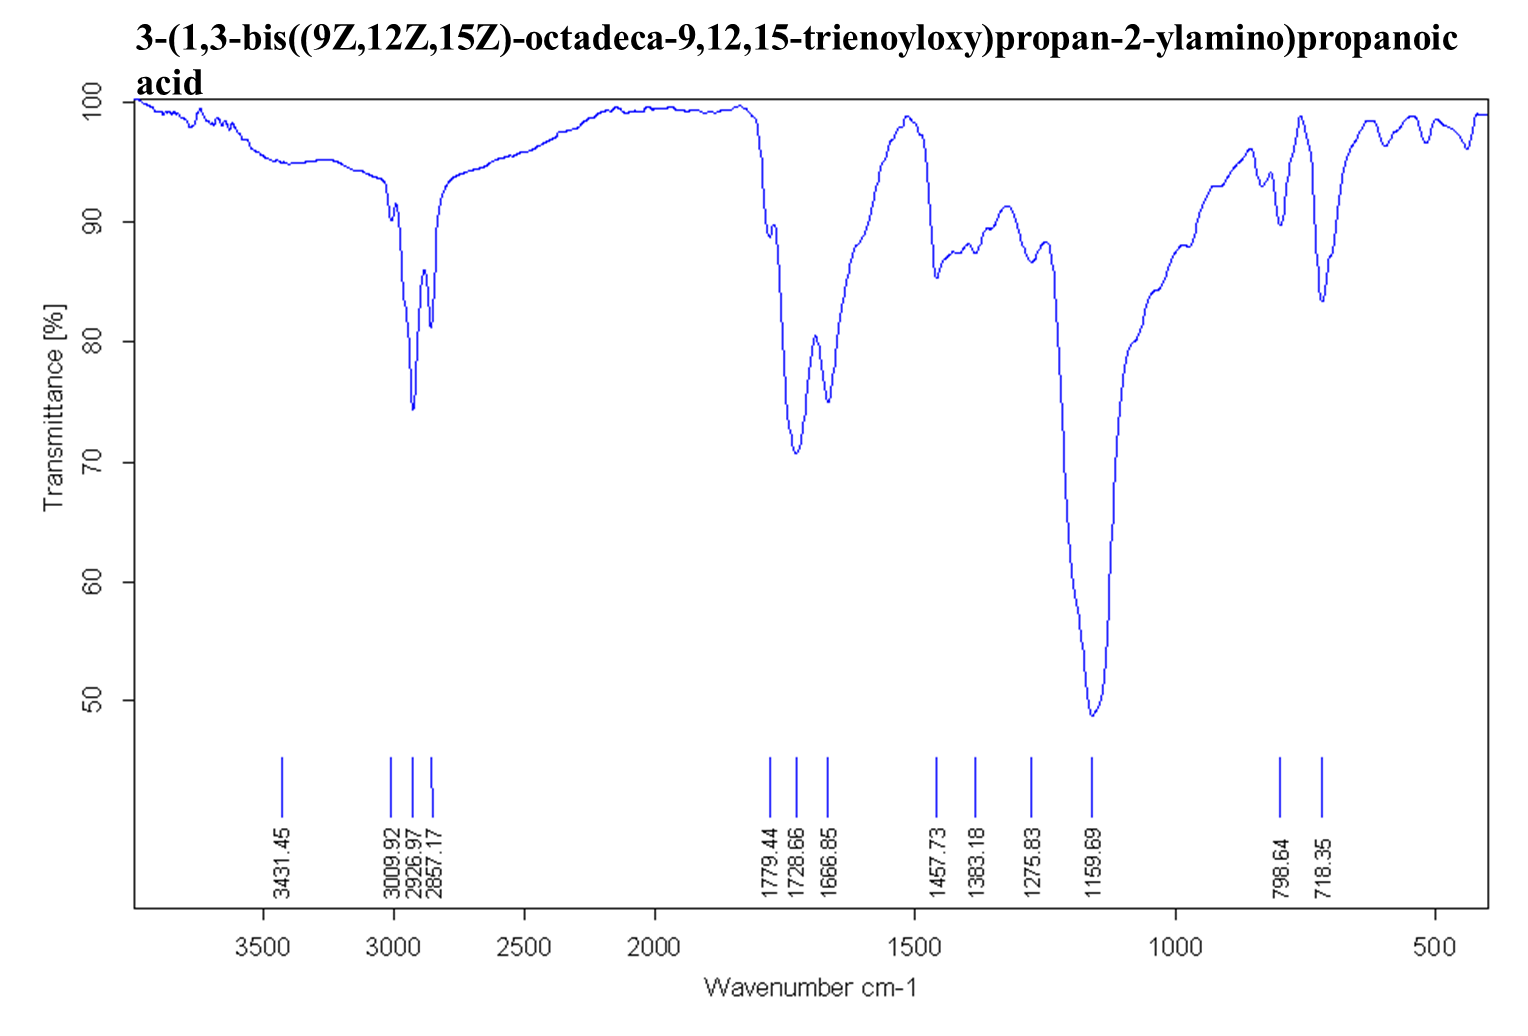


1H NMR characterization of compound 6d


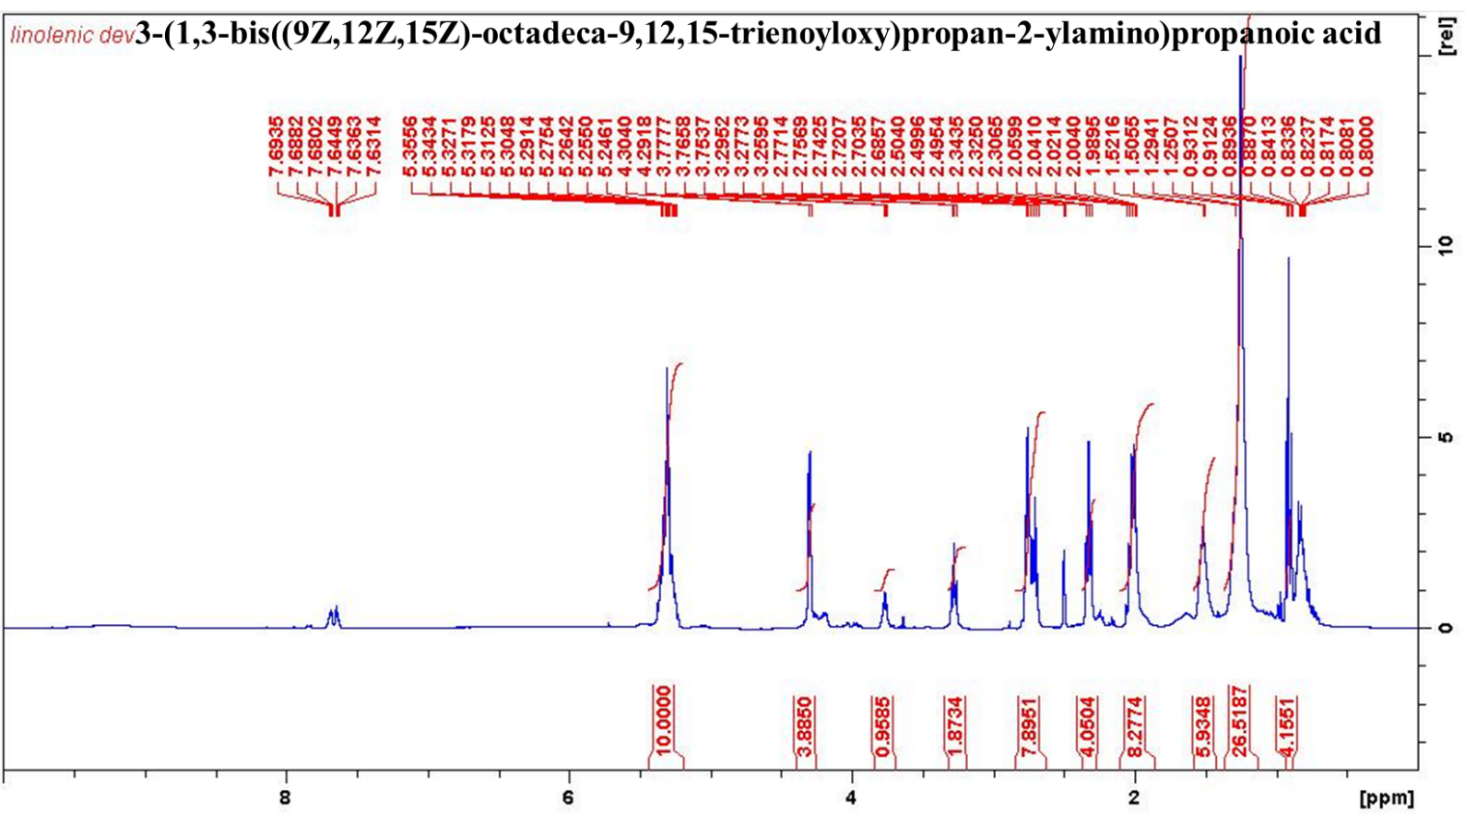


13C NMR characterization of compound 6d


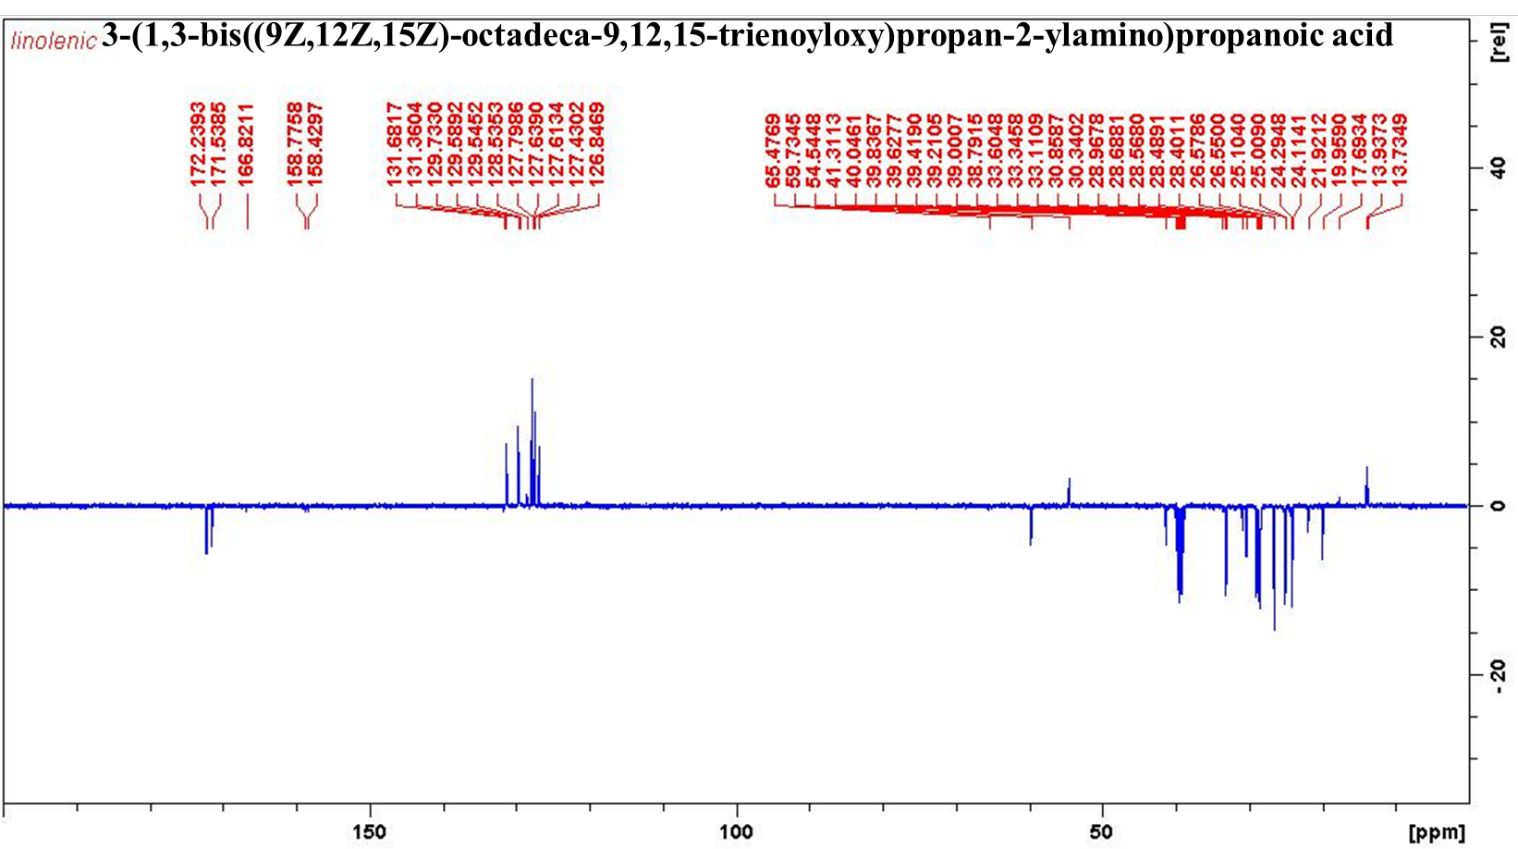


HRMS characterization of Compound 6d


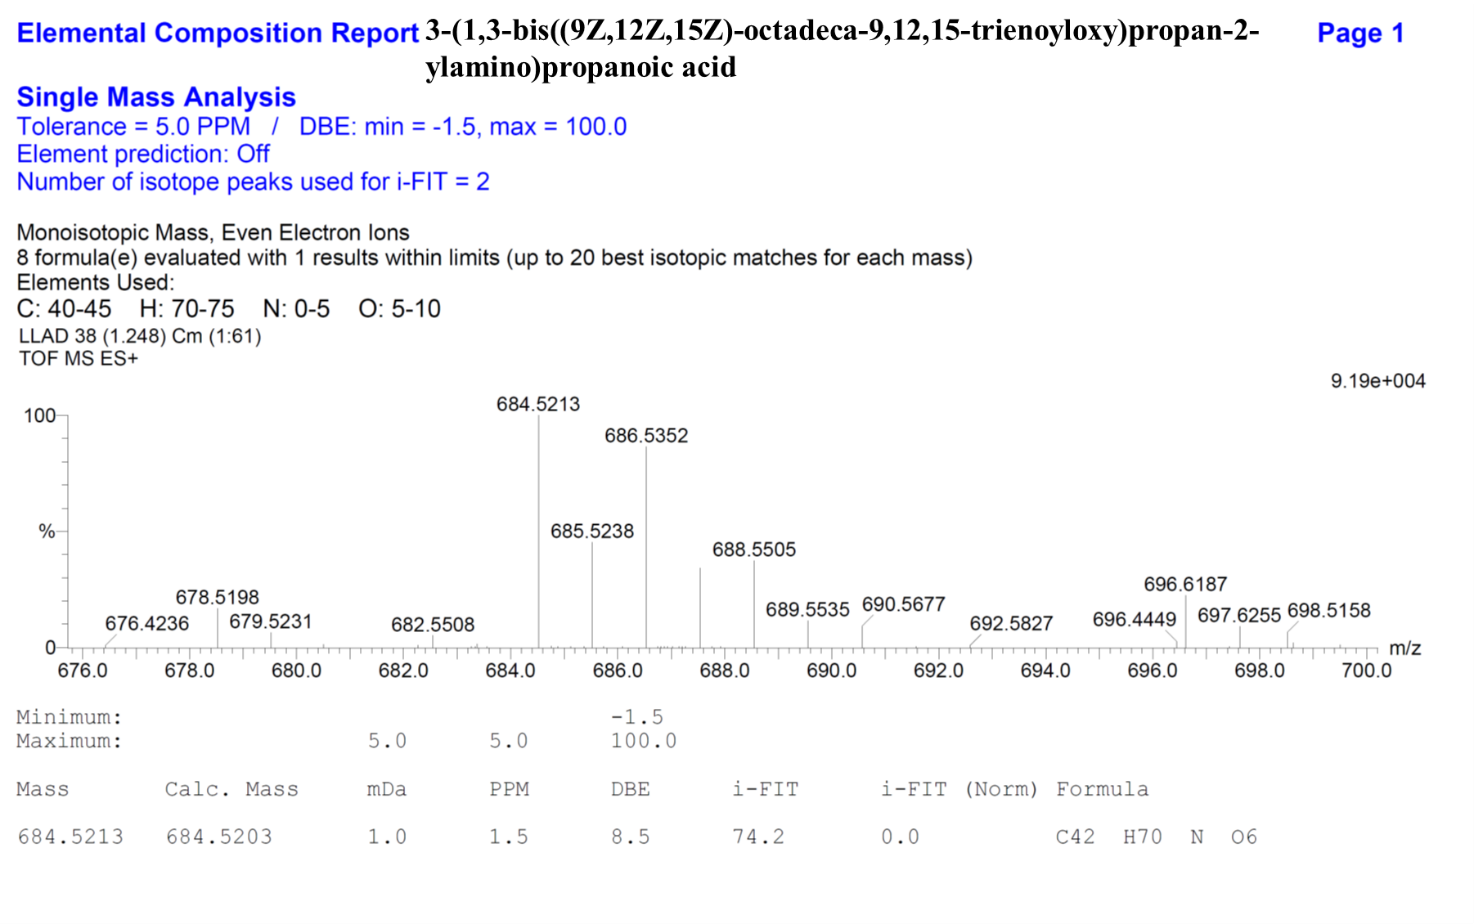


**Table S1a**: Effect of pH on Particle size, PDI and ZP value for different pH-sensitive VAN loaded liposomes.

| **liposome** | **DSAPA-VAN-Lipo** | | |  | **DOAPA-VAN-Lipo** | | |
| --- | --- | --- | --- | --- | --- | --- | --- |
| pH | Size(nm) | PDI | ZP (mV) |  | Size (nm) | PDI | ZP (mV) |
| 7.4 | 89.37±0.549 | 0.184±0.007 | -10.4±2.38 |  | 96.92±8.732 | 0.204±0.014 | -8.85±3.19 |
| 6.0 | 114.0±2.972 | 0.629±0.107 | -1.20±0.176 |  | 162.8±0.012 | 0.176±0.012 | 1.54±0.101 |
| 5.5 | 118.8±1.680 | 0.370±0.016 | 2.05±0.659 |  | 114.5±12.54 | 0.208±0.023 | 0.667±0.654 |

**Table S1b**: Effect of pH on Particle size, PDI and ZP value for different pH-sensitive VAN loaded liposomes.

| **Liposome** | **DLAPA-VAN-Lipo** | | |  | **DLLAPA-VAN-Lipo** | | |
| --- | --- | --- | --- | --- | --- | --- | --- |
| pH | Size (nm) | PDI | ZP(mV) |  | Size (nm) | PDI | ZP (mV) |
| 7.4 | 86.26±11.76 | 0.203±0.010 | -11.3±2.22 |  | 88.52±5.078 | 0.151±0.016 | -11.8±2.99 |
| 6.0 | 158±1.908 | 0.129+0.019 | 1.02±0.1012 |  | 301.2±24.41 | 0.644±0.230 | -1.26±0.427 |
| 5.5 | 97.37±8.928 | 0.350±0.235 | 3.10±0.583 |  | 282±31.58 | 0.532±0.170 | -0.318±0.746 |

**Table S2a**: *In vitro* VAN release data from the different Liposome formulations at pH 7.4

| No | Name of release model | DSAPA-VAN-Lipo | | | DOAPA-VAN-Lipo | | | DLAPA-VAN-Lipo | | | DLLAPA-VAN-Lipo | | | |
| --- | --- | --- | --- | --- | --- | --- | --- | --- | --- | --- | --- | --- | --- | --- |
| R2 | RSME | AIC | R2 | RSME | AIC | R2 | RSME | AIC | R2 | RSME | AIC |
| 1 | Zero order | 0.4277 | 17.72 | 90.54 | 0.5626 | 16.05 | 87.61 | 0.4188 | 17.63 | 90.40 | 0.6067 | 17.45 | 90.07 |
| 2 | First Order | 0.9457 | 24.29 | 64.18 | 0.9609 | 4.292 | 57.89 | 0.9367 | 5.494 | 64.16 | 0.1185 | 12.88 | 83.49 |
| 3 | Higuchi | 0.9358 | 5.919 | 66.44 | 0.9634 | 4.770 | 61.08 | 0.9365 | 5.692 | 65.43 | 0.6945 | 7.610 | 71.70 |
| 4 | Korsmeyer-Peppas | 1 | 2 | 38 | 0.9836 | 2.372 | 38.92 | 0.9886 | 1.924 | 36.06 | 0.9878 | 2.231 | 32.55 |
| 5 | Weibull | 0.9960 | 1.124 | 25.57 | 0.9752 | 2.926 | 43.86 | 0.9882 | 2.044 | 38.95 | 0.9951 | 0.9455 | 24.30 |
| 6 | Hixson-Crowell | 0.8921 | 7.606 | 71.86 | 0.9347 | 5.203 | 61.66 | 0.8818 | 7.593 | 71.48 | 0.1052 | 14.45 | 85.98 |

**Table S2b**: *In vitro* VAN release data from the different Liposome formulations at pH 6.0

| No | Name of release model | DSAPA-VAN-Lipo | | | DOAPA-VAN-Lipo | | | DLAPA-VAN-Lipo | | | DLLAPA-VAN-Lipo | | | |
| --- | --- | --- | --- | --- | --- | --- | --- | --- | --- | --- | --- | --- | --- | --- |
| R2 | RSME | AIC | R2 | RSME | AIC | R2 | RSME | AIC | R2 | RSME | AIC |
| 1 | Zero order | 0.0033 | 21.14 | 94.39 | 0.0783 | 22.15 | 95.33 | 0.2067 | 21.71 | 95.03 | 0.3804 | 19.37 | 92.49 |
| 2 | First Order | 0.8325 | 8.631 | 74.74 | 0.9067 | 7.041 | 70.25 | 0.9322 | 6.096 | 66.43 | 0.9699 | 4.056 | 57.22 |
| 3 | Higuchi | 0.8841 | 7.186 | 70.60 | 0.8990 | 7.280 | 70.45 | 0.9160 | 6.932 | 69.70 | 0.9566 | 5.027 | 62.53 |
| 4 | Korsmeyer-Peppas | 0.9947 | 1.407 | 31.59 | 0.9969 | 1.162 | 27.65 | 0.9767 | 3.237 | 48.07 | 0.9941 | 1.568 | 33.75 |
| 5 | Weibull | 0.9957 | 1.252 | 29.70 | 0.9963 | 1.226 | 28.93 | 0.9818 | 2.877 | 46.47 | 0.9958 | 1.326 | 31.07 |
| 6 | Hixson-Crowell | 0.7378 | 10.78 | 79.64 | 0.8510 | 8.864 | 75.33 | 0.8886 | 7.883 | 72.29 | 0.9370 | 6.032 | 66.47 |

**Table S3**. *In vitro* release best fit values for different formulation at pH 7.4 and 6.0

| pH |  | | 7.4 | 6.0 |
| --- | --- | --- | --- | --- |
| Formulation | Model | Equation | Release Exponent | Release Exponent |
| DSAPA-VAN-Lipo | KP | Q = k.tn | n = 0.777 | n=0.625 |
|  | WB | Q = 1 exp [-(t)a/b | n = 0.856 | β= 0.792 |
| DOAPA-VAN-Lipo | KP | Q = k.tn | n = 0.629 | β= 0.646 |
|  | WB | Q = 1 exp [-(t)a/b | n = 0.840 | β= 0.842 |
| DLAPA-VAN-Lipo | KP | Q = k.tn | n = 0.777 | β= 0.658 |
|  | WB | Q = 1 exp [-(t)a/b | n = 0.830 | β= 0.825 |
| DLLAPA-VAN-Lipo | KP | Q = k.tn | n =0.536 | n= 0.679 |
|  | WB | Q = 1 exp [-(t)a/b | n = 0.540 | β= 0.667 |

KP= Korsmeyer-Peppas, WB= Weibull

**Table S4a**: Effect of storage on physicochemical characteristics of vancomycin loaded liposomes (DSAPA-VAN-Lipo)

| Storage condition | Particle size | | PDI | | ZP | |
| --- | --- | --- | --- | --- | --- | --- |
| Time (days) | RT | 4 ºC | RT | 4 ºC | RT | 4 ºC |
| 0 | 94.44±0.8581 | 96.94±0.8865 | 0.225±0.008 | 0.232±0.007 | -11.3±2.65 | -7.93±24 |
| 30 | 231.6±71.74 | 107.4±8.824 | 0.686±0.264 | 0.381±0.052 | -17.7±8.89 | -9.10±3.15 |
| 60 | 681.6±71.74 | 97.84±6.859 | 0.686±0.264 | 0.250±0.046 | -22.4±10.5 | -15.1±6.94 |
| 90 | 1073±8.741 | 104.4±9.384 | 0.534±0.256 | 0.318±0.077 | -25±8.5 | -12.2±2.98 |

**Table S4b**: Effect of storage on physicochemical characteristics of vancomycin loaded liposomes (DOAPA-VAN-Lipo)

| Storage condition  Time (days) | Particle size | | PDI | | ZP | |
| --- | --- | --- | --- | --- | --- | --- |
| RT | 4 ºC | RT | 4 ºC | RT | 4 ºC |
| 0 | 79.83±1.505 | 84.17±5.957 | 0.192±0.009 | 0.169±0.024 | -12.8±3.79 | -13.0±3.45 |
| 30 | 84.13±12.59 | 86.46±1.368 | 0.248±0.068 | 0.198±0.025 | -15.8±5.45 | -12.4±3.82 |
| 60 | 93.30±12.44 | 80.33±1.566 | 0.293±0.054 | 0.191±0.021 | -20.2±8.82 | -14.4±0.183 |
| 90 | 101.2±9.590 | 81.58±1.294 | 0.223±0.040 | 0.182±0.011 | -33.2±7.81 | -11.3±3.30 |

**Table S4c**: Effect of storage on physicochemical characteristics of vancomycin loaded liposomes (DLAPA-VAN-Lipo)

| Storage condition | Particle size | | PDI | | ZP | |
| --- | --- | --- | --- | --- | --- | --- |
| Time (days) | RT | 4 ºC | RT | 4 ºC | RT | 4 ºC |
| 0 | 82.92±2.615 | 76.98±0.8767 | 0.161±0.010 | 0.170±0.016 | -11.8±3.39 | -11.2±2.90 |
| 30 | 128.6±5.178 | 87.13±8.114 | 0.078±0.010 | 0.204±0.043 | -16.3±3.91 | -13.1±5.70 |
| 60 | 157.7±1.754 | 74.40±1.467 | 0.207±0.016 | 0.194±0.020 | -18.6±4.4 | -14.6±3.51 |
| 90 | 177.6±3.284 | 81.86±1.249 | 0.223±0.020 | 0.182±0.011 | -33.2±7.81 | -13.2±3.24 |

**Table S4d**: Effect of storage on physicochemical characteristics of vancomycin loaded liposomes (DLLAPA-VAN-Lipo)

| Storage condition | | Particle size | | PDI | | ZP | |
| --- | --- | --- | --- | --- | --- | --- | --- |
| Time (days) | RT | | 4 ºC | RT | 4 ºC | RT | 4 ºC |
| 0 | 91.20±16.42 | | 83.90±6.13 | 0.217±0.080 | 0.149±0.017 | -10.1±3.06 | -11.0±3.27 |
| 30 | 177±7.86 | | 80.51±2.332 | 0.450±0.376 | 0.168±0.00 | -19.4±13.0 | -12.4±3.20 |
| 60 | 257.5±55.86 | | 92.05±4.297 | 0.296±0.151 | 0.232±0.052 | -11.0±14.5 | -13.7±3.94 |
| 90 | 393.9±36.9 | | 104.3±4.949 | 0.296±0.151 | 0.240±0.081 | -15.8±5.47 | -18.8±5.65 |
